# Supplementary material
Source: publisher figshare collection journal article supplement (https://acs.figshare.com/ndownloader/files/14851187)
Supplement: Supplementary file 1 [file 14851187]

*Supplementary material related to the article*

**GALLOYL CARBOHYDRATES WITH ANTIANGIOGENIC ACTIVITY MEDIATED BY  
CAPILLARY MORPHOGENESIS GENE 2 (CMG2) PROTEIN BINDING**

Elisa G.-Doyagüez<sup>1,2#</sup>, Paula Carrero<sup>1,¥#</sup>, Andrés Madrona<sup>1,γ</sup>, Patricia Rodríguez-Salamanca<sup>1,λ</sup>, Belén Martínez-Gualda<sup>1,π</sup>, María-José Camarasa<sup>1</sup>, María Luisa Jimeno<sup>2</sup>, Philip R. Bennallack<sup>3</sup>, Jordan G. Finnell<sup>4,φ</sup>, Tsz Ming Tsang<sup>4</sup>, Kenneth A. Christensen<sup>4</sup>, Ana San-Félix<sup>\*1</sup>, Michael S. Rogers<sup>\*3</sup>

<sup>1</sup>Instituto de Química Médica (IQM, CSIC), Madrid, Spain

<sup>2</sup>Centro de Química Orgánica “Lora-Tamayo” (CENQUIOR, CSIC), Madrid, Spain

<sup>3</sup>Vascular Biology Program, Boston Children’s Hospital and Harvard Medical School, Boston, MA, USA

<sup>4</sup>Department of Chemistry and Biochemistry, Brigham Young University, Provo, UT, USA

<sup>¥</sup>Current address: Laboratorios Liconsa, S.A., Azuqueca de Henares - Guadalajara, Spain

<sup>γ</sup>Current address: Novartis Farmacéutica S.A., Barcelona, Spain

<sup>π</sup> Current address: Rega Institute for Medical Research, Laboratory of Medicinal Chemistry, Leuven, Belgium

<sup>φ</sup> Current address: Center for Alzheimer’s and Neurodegenerative Diseases, University of Texas Southwestern Medical Center, Dallas, TX, USA

<sup>λ</sup> Current address: Instituto de Investigaciones Químicas, Sevilla, Spain

*\*Corresponding authors:*

*Ana San-Félix: Tel: + 34 91 2587617, E-mail: anarosa@iqm.csic.es*

*Michael Rogers: Tel: +1-617-919-2252, E-mail: michael.rogers@tch.harvard.edu*

Includes:

1. Structural assignments
2. Inhibitory effects of **4**, **7**, **8**, **13**, **19** and **29** with respect to PA-CMG2 inhibition. Dose-response curves determined by a FRET interaction assay
3. Selected <sup>1</sup>H and <sup>13</sup>C NMR spectra

## 1. Structural assignments

The structures of the novel carbohydrate derivatives were assigned by  $^1\text{H}$  and  $^{13}\text{C}$  NMR spectroscopic analysis. In the case of the gallic acid monosaccharide series, compounds **3-10**, the spectroscopic data were identical to those reported previously.<sup>1</sup>

For the novel 2,3,4-trihydroxybenzoyl monosaccharide and disaccharide compounds well-known NMR rules,<sup>2</sup> together with bidimensional NOESY and ROESY experiments and  $^{13}\text{C}$ - $^1\text{H}$  techniques (gHMBC<sup>3</sup> and gHSQC<sup>4</sup>) have been applied for the unequivocal assignment of the structures.

Table 1 showed all the chemical shifts and coupling constants observed for 2,3,4-trihydroxybenzoyl monosaccharides series.

**Table 1.** NMR data (chemical shifts and coupling constants) observed for 2,3,4-trihydroxybenzoyl monosaccharide series.

|                        | <b>13</b> $\alpha/\beta$ -D-Glcp* | <b>15</b> $\alpha$ -D-Galf** | <b>18</b> $\alpha$ -D-Manp | <b>19</b> $\beta$ -D-Manp | <b>22</b> $\alpha$ -D-Ribp                 | <b>23</b> $\beta$ -D-Ribp      |
|------------------------|-----------------------------------|------------------------------|----------------------------|---------------------------|--------------------------------------------|--------------------------------|
| $\delta$ (ppm)         |                                   |                              |                            |                           |                                            |                                |
| C-1                    | 91.76/93.97                       | 95.85                        | 92.65                      | 92.13                     | 90.71                                      | 93.84                          |
| C-2                    | 71.95/72.45                       | 77.38                        | 70.27                      | 70.72                     | 68.22                                      | 68.88 or 69.07                 |
| C-3                    | 72.12/74.28                       | 75.47                        | 71.35                      | 72.47                     | 68.99                                      | 67.73                          |
| C-4                    | 70.17/ 70.75                      | 80.68                        | 66.60                      | 67.25                     | 67.41                                      | 68.88 or 69.07                 |
| C-5                    | 72.23/74.20                       | 71.60                        | 72.44                      | 73.90                     |                                            | 64.76                          |
| C-6                    | 63.89/64.09                       | 63.95                        | 62.69                      | 62.98                     | -                                          | -                              |
| H-1                    | 6.85/6.39                         | 6.80                         | 6.57                       | 6.53                      | 6.56                                       | 6.57                           |
| H-2                    | 5.70/5.75                         | 5.94                         | 5.93                       | 6.08                      | 5.76                                       | 5.62-5.70                      |
| H-3                    | 6.20/6.08                         | 6.26                         | 5.98                       | 5.92                      | 6.15                                       | 6.01                           |
| H-4                    | 5.82/5.75                         | 4.79-4.85                    | 6.16                       | 6.05                      | 5.60                                       | 5.62-5.70                      |
| H-5                    | 4.50-4.70                         | 5.85                         | 4.52-4.68                  | 4.49                      | 4.13 ( $5_A$ ), 4.45 ( $5_B$ )             | 4.21 ( $5_A$ ), 4.46 ( $5_B$ ) |
| H-6 <sub>A</sub>       | 4.50-4.70                         | 4.65                         | 4.52-4.68                  | 4.62                      |                                            |                                |
| H-6 <sub>B</sub>       | 4.50-4.70                         | 4.79-4.85                    | 4.52-4.68                  | 4.71                      |                                            |                                |
| $^3J_{\text{HH}}$ (Hz) |                                   |                              |                            |                           |                                            |                                |
| $^3J_{1,2}$            | 3.7/7.9                           | 4.8                          | 1.9                        | 1.1                       | 3.9                                        | 2.7                            |
| $^3J_{2,3}$            | 9.9/9.6                           | 6.4                          | 3.2                        | 3.2                       | 3.5                                        | 3.9                            |
| $^3J_{3,4}$            | 9.9/9.6                           | 6.4                          | 10.2                       | 9.9                       | 4.0                                        | 3.9                            |
| $^3J_{4,5}$            | 9.9/9.3                           | 3.6                          | 10.1                       | 9.9                       | 4.2 ( $^3J_{4,5A}$ ), 9.1 ( $^3J_{4,5B}$ ) | 3.5                            |
| $^3J_{5,6A}$           | -                                 | 6.0                          | -                          | 3.0                       | 11.5 ( $^3J_{5A,5B}$ )                     | 13.3 ( $^3J_{5A,5B}$ )         |
| $^3J_{5,6B}$           | -                                 | 5.6                          | -                          | 2.5                       |                                            |                                |
| $^2J_{6A,6B}$          | -                                 | 12.4                         | -                          | 12.5                      |                                            |                                |

\*p: Pyranose form

\*\*f: Furanose form

According to the NMR carbohydrate rules,<sup>2</sup> for pyranoses in a  $^4\text{C}_1$  conformation, a large coupling constant ( $J_{1,2} = 7\text{-}10$  Hz) between the anomeric H1 and the H2 indicates that both protons are in an axial configuration, whereas if they are equatorial-axial the coupling constant is smaller ( $J_{1,2} \sim 4$  Hz) and for axial-equatorial or equatorial-equatorial oriented protons even smaller coupling constants are observed ( $J_{1,2} < 2$  Hz). Following these rules the glucopyranose derivative **13** were confirmed as an anomeric  $\alpha/\beta$  mixture 1:2.

In the case of the galactose derivative **15**, the  $^{13}\text{C}$  NMR spectrum shows that the chemical shifts are in agreement with those reported for a furanose with  $\alpha$  configuration ( $\alpha$ -Galf) instead of a pyranose form (Table

1).<sup>5-7</sup> The multiplicity and  $J$  value of the H-3,  $\delta = 6.26$  (t,  $J = 6.4$  Hz, 1H, H-3) is also consistent with a furanose form. Moreover, the  $J_{1,2}$  value obtained for this compound (4.8 Hz) is characteristic of a furanose ( $\alpha$ -Gal $f$ ) configuration. Furanose conformation was corroborated using a bidimensional HMBC experiment. Thus, the 2D-HMBC spectrum (Figure 1) shows two intense correlation signals, between C-1/H-4 and C-4/H-1, only possible if the sugar is in the furanose form (C1 and C4 separated by three bonds).

#### Compound 15

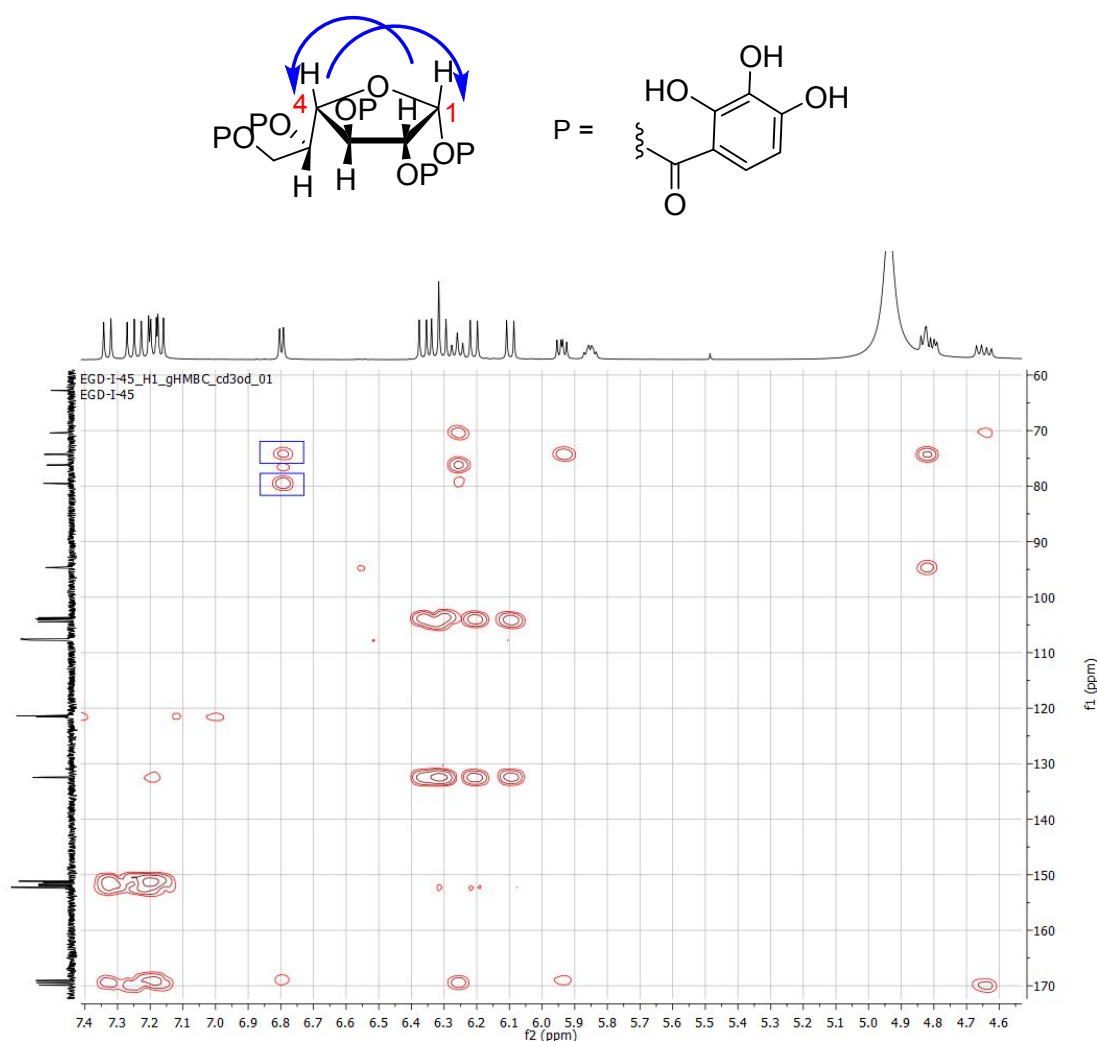

**Figure 1.** Structural assignments and HMBC correlations observed for galactose derivative **15**

For mannose derivatives **18** and **19**, the  $J_{1,2}$  values obtained were very similar (1.9 Hz and 1.1 Hz, respectively) and  $\alpha$  and  $\beta$  assignment was not easy (Table 1).

In the HMBC spectrum for compound **18** a correlation between H-1 and C-3 was observed indicating that H-1 is situated in an equatorial position ( $\alpha$ -configuration), giving the appropriate dihedral angle value (C1, C2 and C3 in W disposition) (Figure 2 left). However HMBC for **19** ( $\beta$ -configuration) did not show such correlation (Figure 2, right).

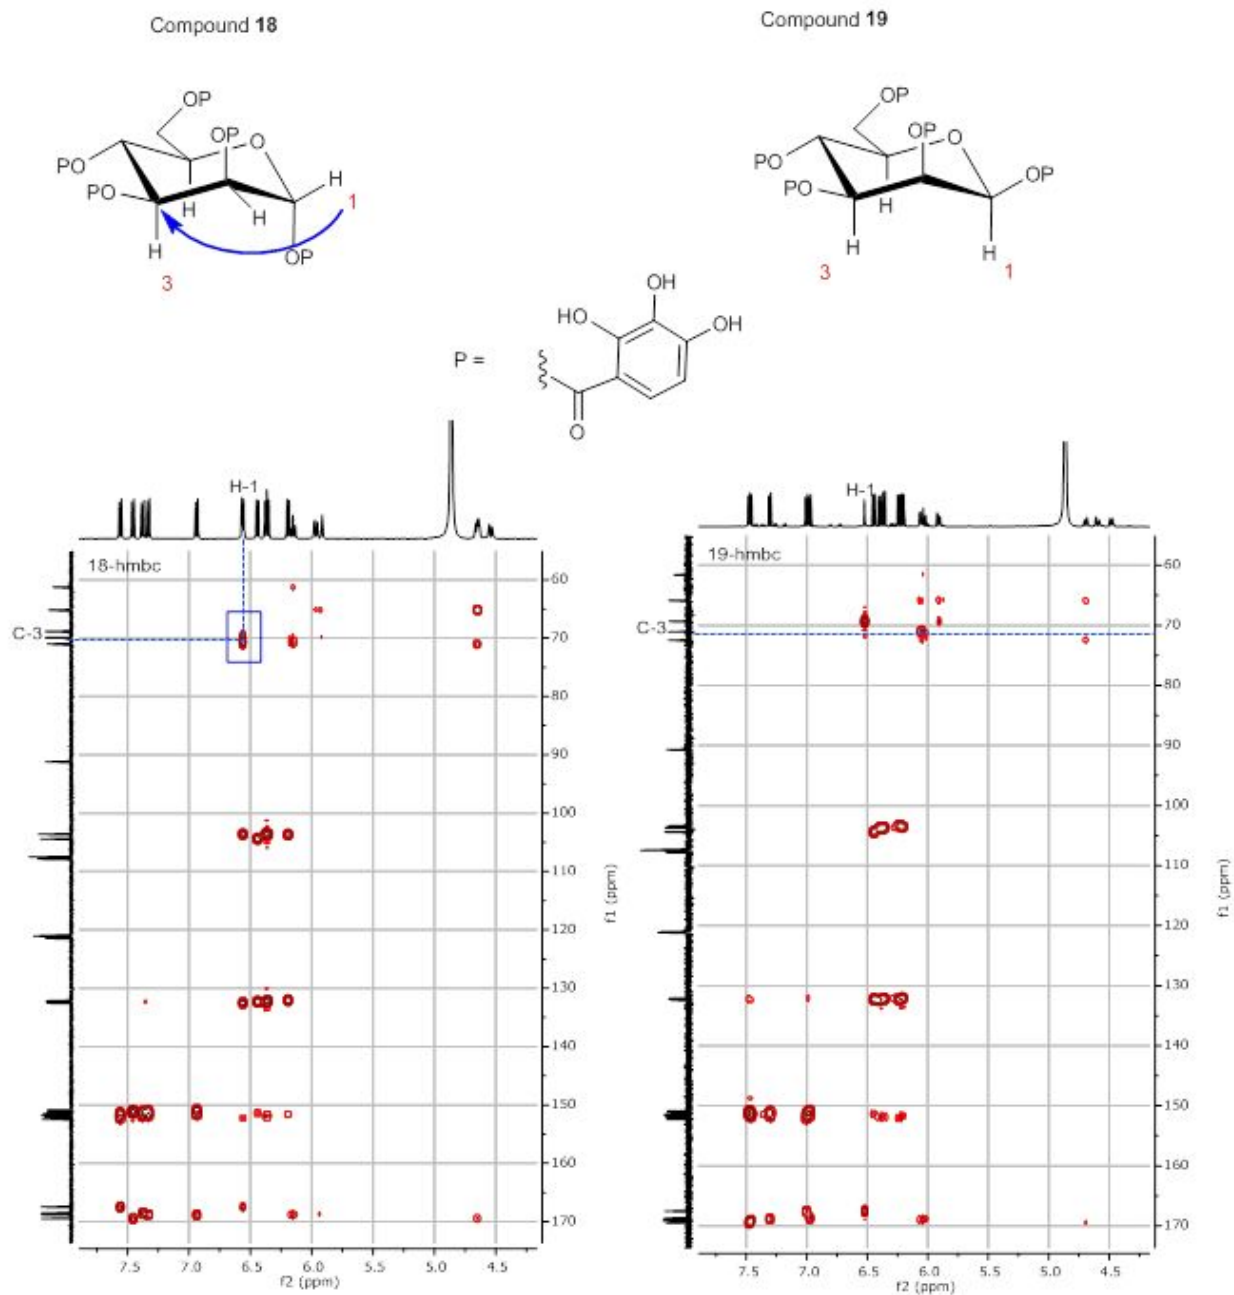

**Figure 2.** Structural assignments and HMBC correlations observed for mannose derivatives **18** (left) and **19** (right)

In the 2D-ROESY spectrum of **19** correlations H-1/H-3 and H-1/H-5 were observed. However, in compound **18**, H-1 only correlates with H-2 (Figure 3). These data also support the proposed structures.

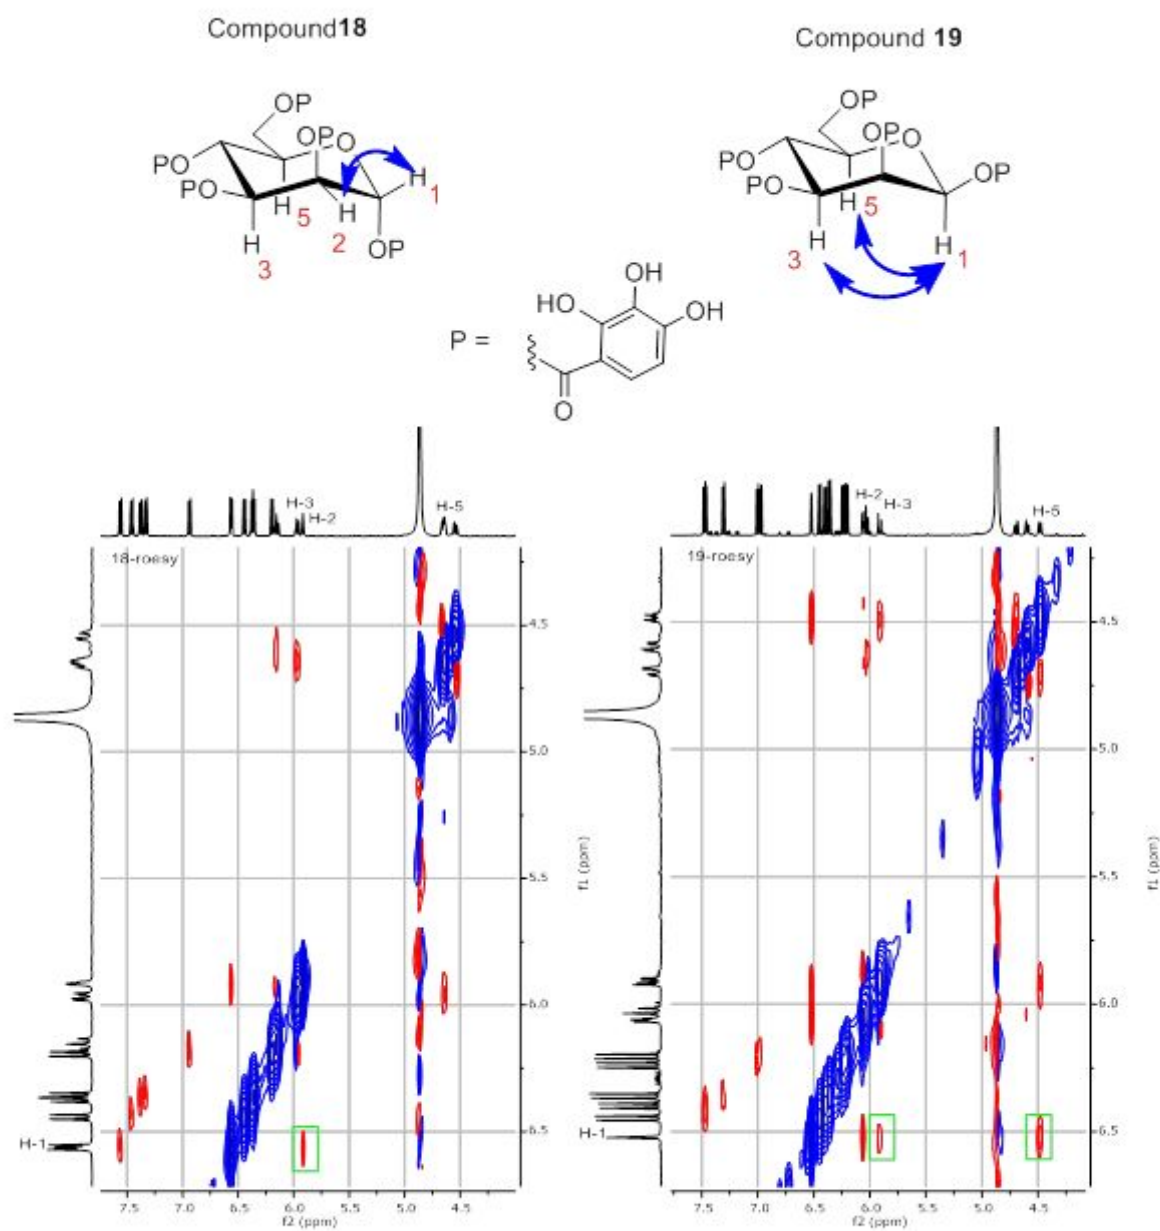

**Figure 3.** Structural assignments and ROESY correlations observed for mannose derivatives **18** and **19**

The  ${}^4C_1$  conformation and  $\alpha$  configuration of the ribopyranose derivative **22** was supported by a small coupling constant ( $J_{1,2}=3.9$  Hz) (Table 1). However the smaller coupling constant observed for **23** ( $J_{1,2}=2.7$  Hz) does not match with a  ${}^4C_1$   $\beta$  configuration. For this compound gHMBC experiments (Figure 4) revealed two long-range correlations between the H1 proton ( $\delta$  6.57 ppm) and the C3 ( $\delta$  67.73 ppm) and C5 carbons ( $\delta$  64.76 ppm). These data allowed to propose for **23** a different conformational state ( ${}^1C_4$ ) and a  $\beta$  configuration.

Compound 23

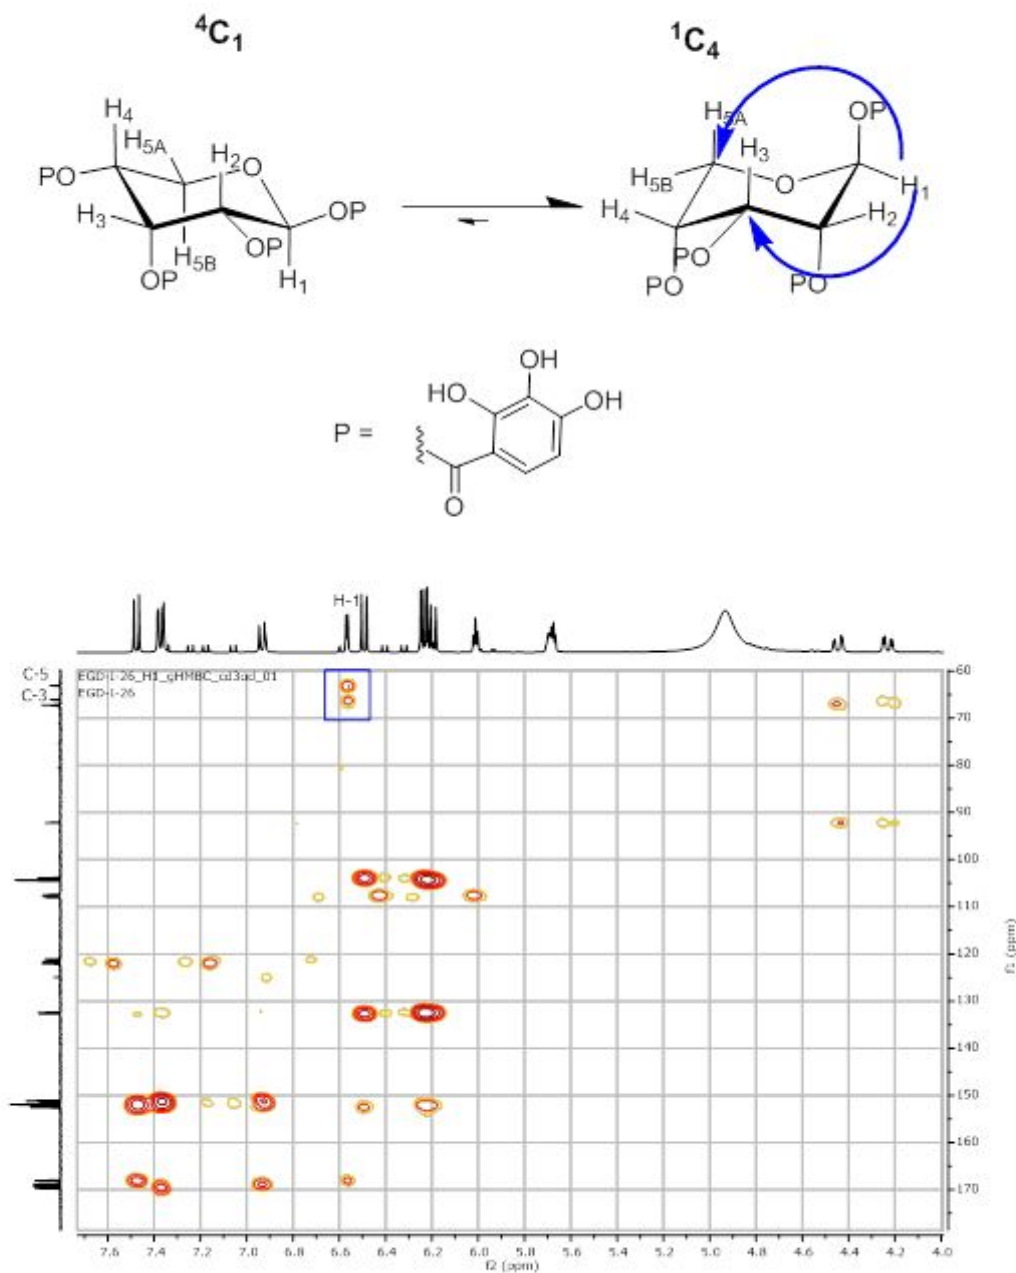

**Figure 4.** Structural assignments and HMBC correlation, observed for ribose derivative **23**

For the disaccharide compounds **25**, **27**, **29** and **31**, homonuclear COSY spectra were used in the identification of individual monosaccharide residues.

In the galloyl maltose derivative **25**, a coupling constant  $J_{1,2} = 3.9$  Hz allowed the unambiguous assignment of a  $\beta$  configuration for residue B (numbered 1-6), while a coupling constant  $J_{1,2} = 8.3$  Hz corroborates the  $\alpha$  configuration of residue A (numbered 1'-6'). The same was observed for the 2,3,4-trihydroxybenzoyl maltose derivative **29**.

Compound **25**

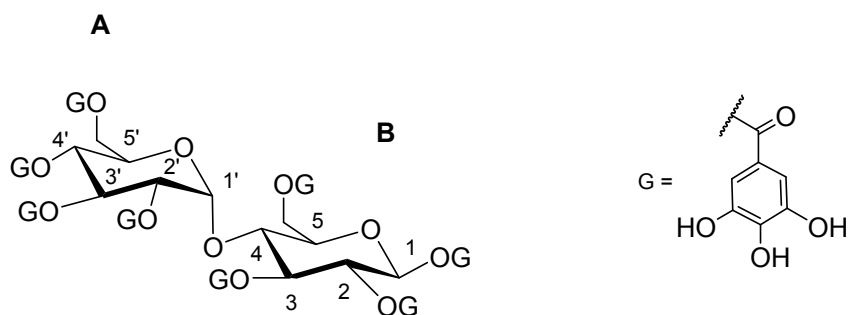

**Figure 5.** Structure of compound **25** as a representative example of a maltose derivative

In trehalose derivatives, **27** and **31**, two coupling constants  $J_{1,2} = 3.7$  Hz allowed the unambiguous assignment of a  $\alpha,\alpha$  configuration for the two sugar residues.

Compound **27**

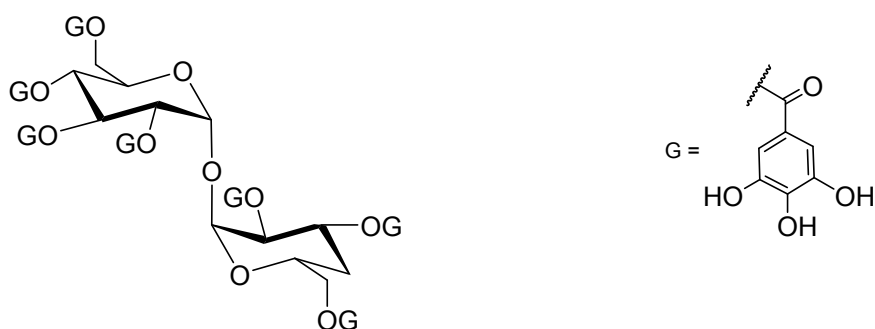

**Figure 6.** Structure of compound **27** as a representative example of a trehalose derivative

**2. Inhibitory effects of 4, 7, 8, 13, 19 and 29 with respect to PA-CMG2 inhibition. Dose-response curves determined by a FRET interaction assay**

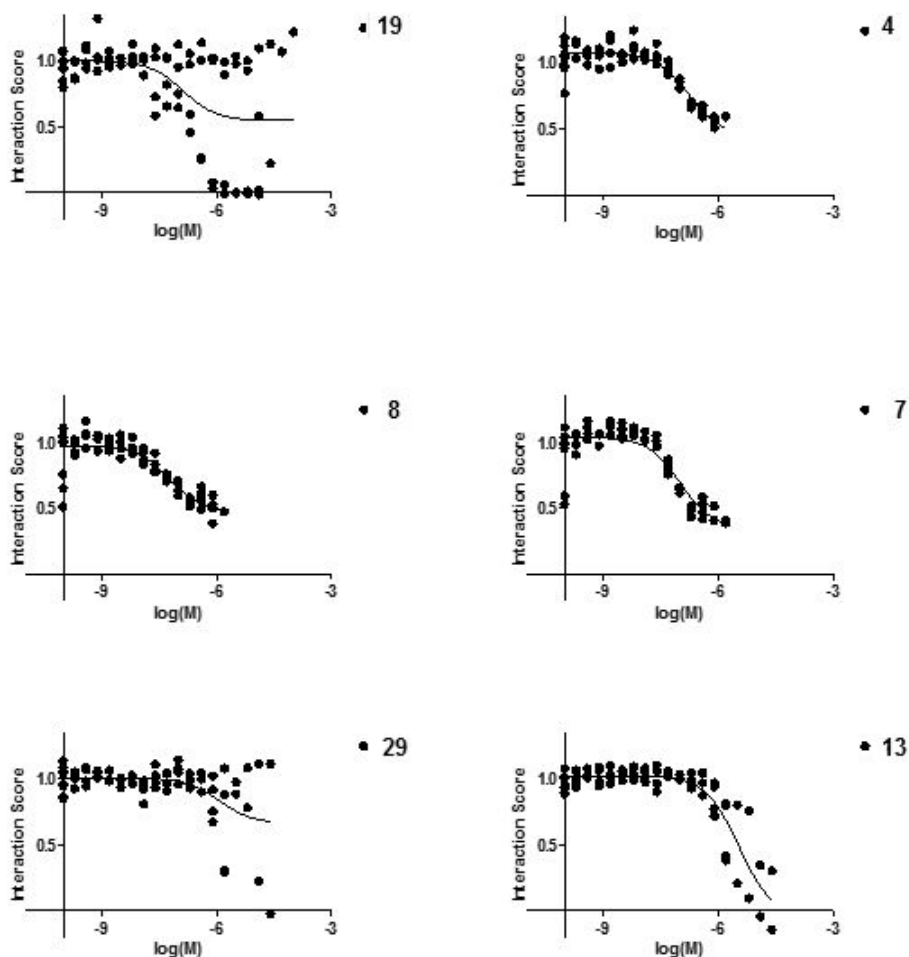

**Figure 7.** Dose-response curves for synthesized compounds 4, 7, 8, 13, 19 and 29

Interaction score represents the fraction of control interaction exhibited in a given well. Curves are best-fit binding isotherms with Hill coefficient of 1.



### 3. Selected $^1\text{H}$ and $^{13}\text{C}$ NMR spectra

#### Compound 12 ( $^1\text{H}$ -NMR)

EGD-I-15.10.fid

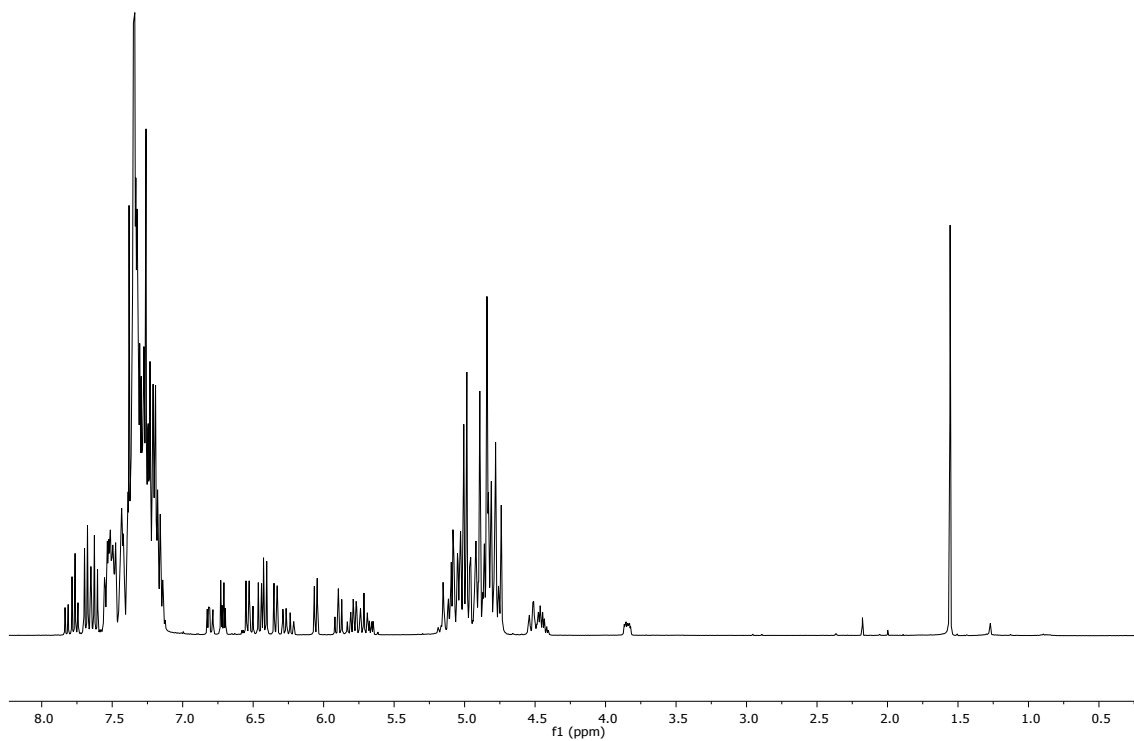

#### Compound 12 ( $^{13}\text{C}$ -NMR)

EGD-I-15.11.fid

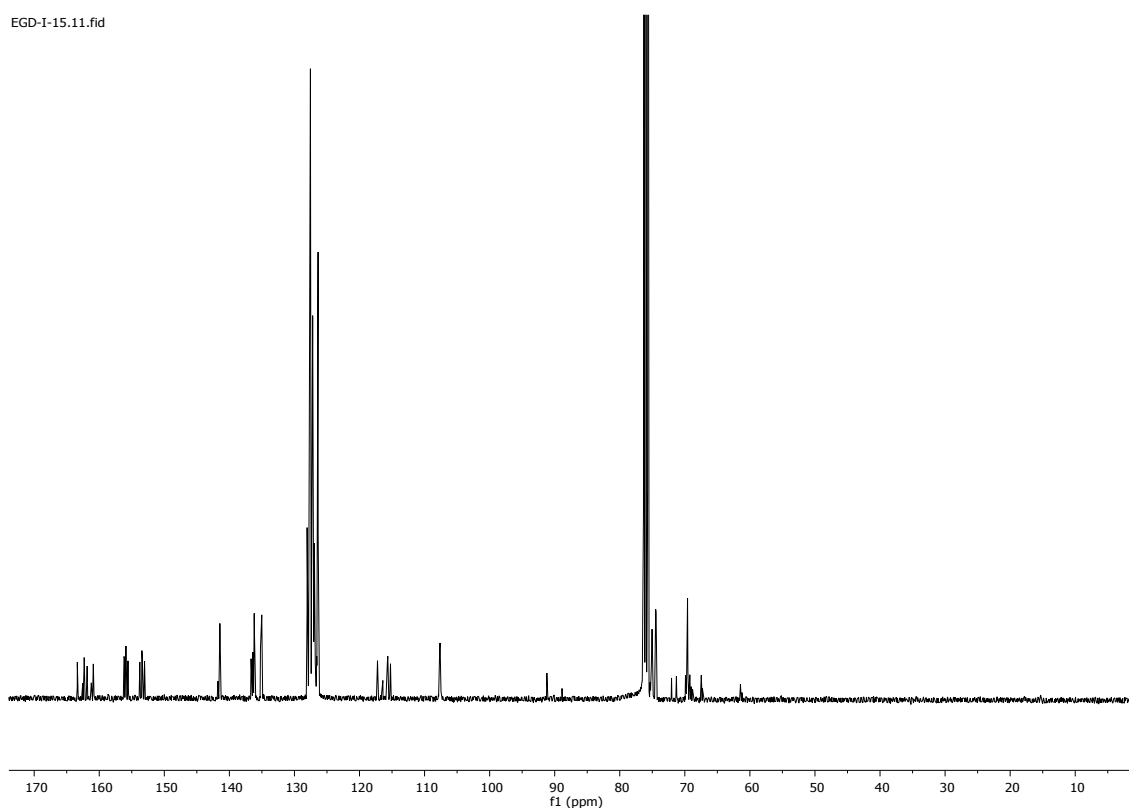

### Compound 13 ( $^1\text{H}$ -NMR)

EGD-I-24-solido\_H1\_s2pul\_cd3od\_01  
EGD-I-24-solido

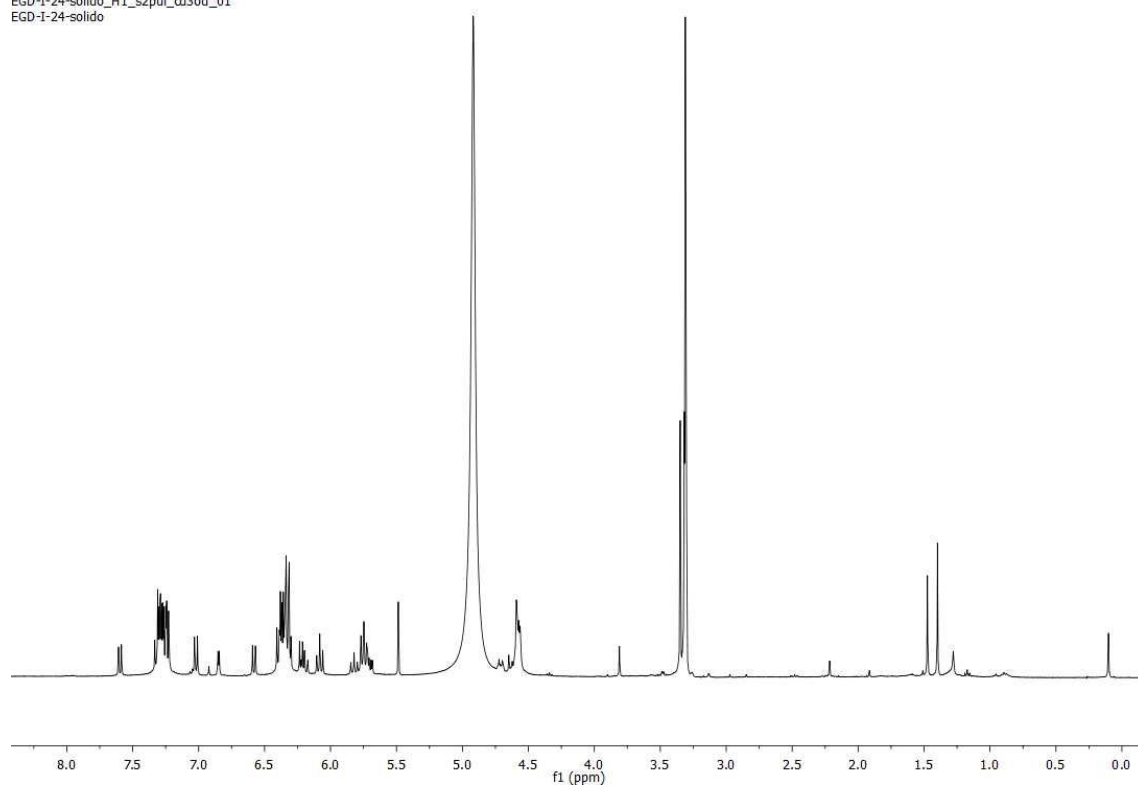

### Compound 13 ( $^{13}\text{C}$ -NMR)

EGD-I-24-solido\_C13\_s2pul\_cd3od\_02  
EGD-I-24-solido

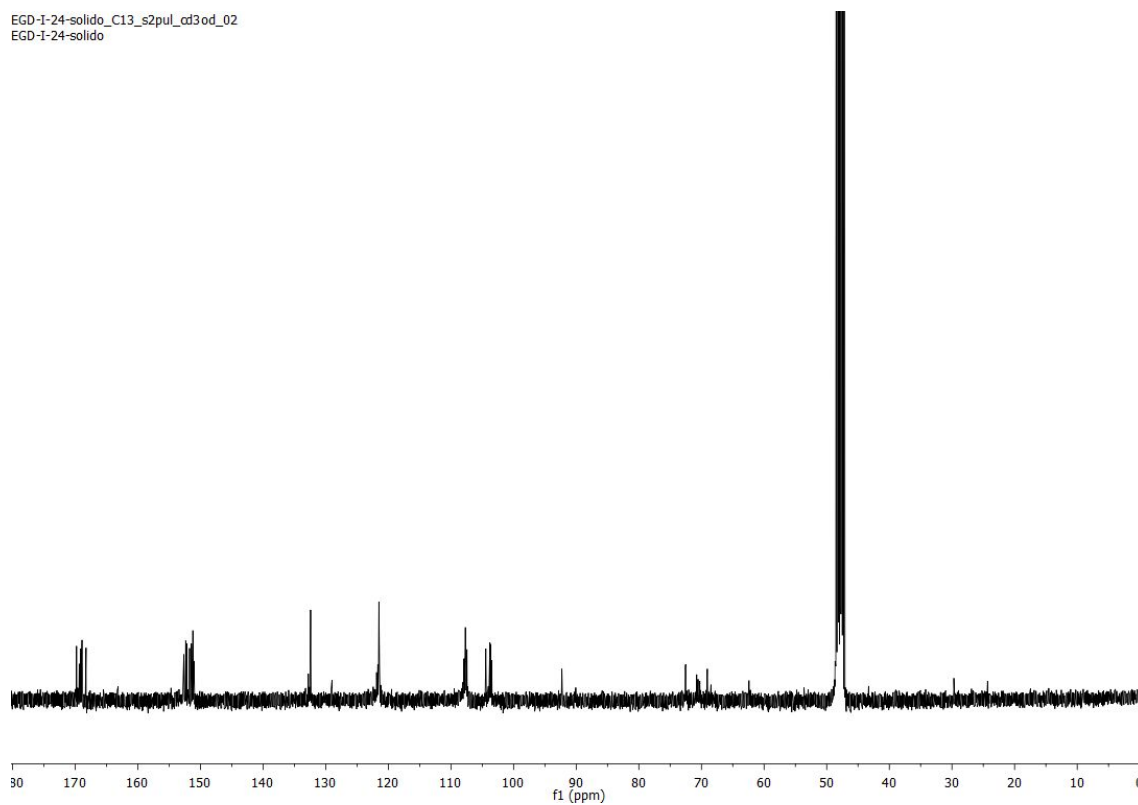

### Compound 14 ( $^1\text{H}$ - NMR)

EGD-I-18-F5-cdcd3  
EGD-I-18-F5-cdcd3

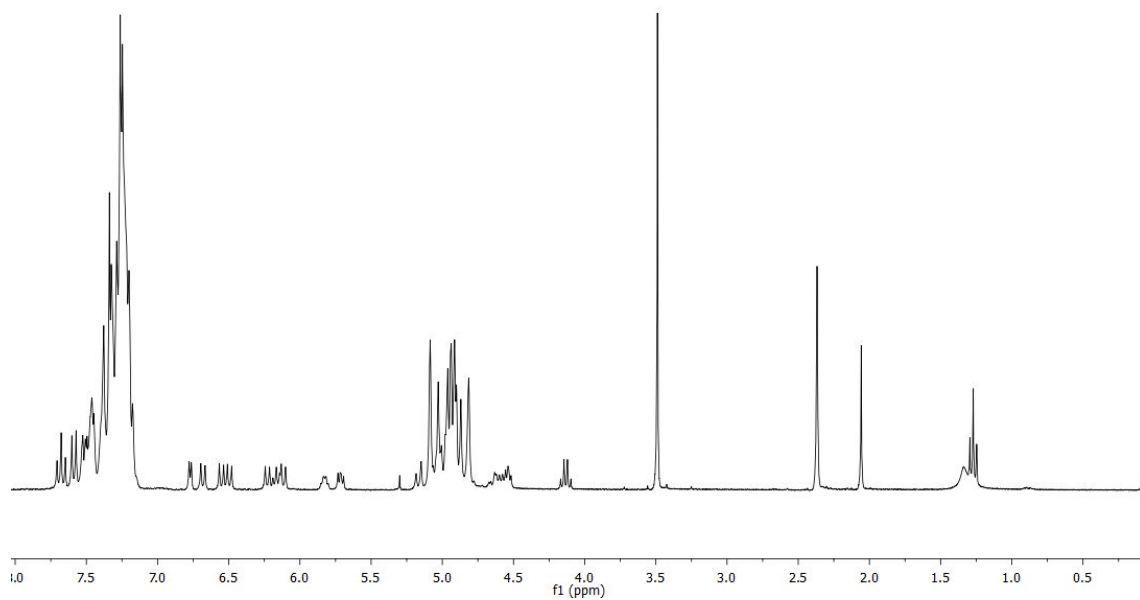

### Compound 15 ( $^1\text{H}$ - NMR)

EGD-I-45\_H1\_s2pul\_cd3od\_01  
EGD-I-45

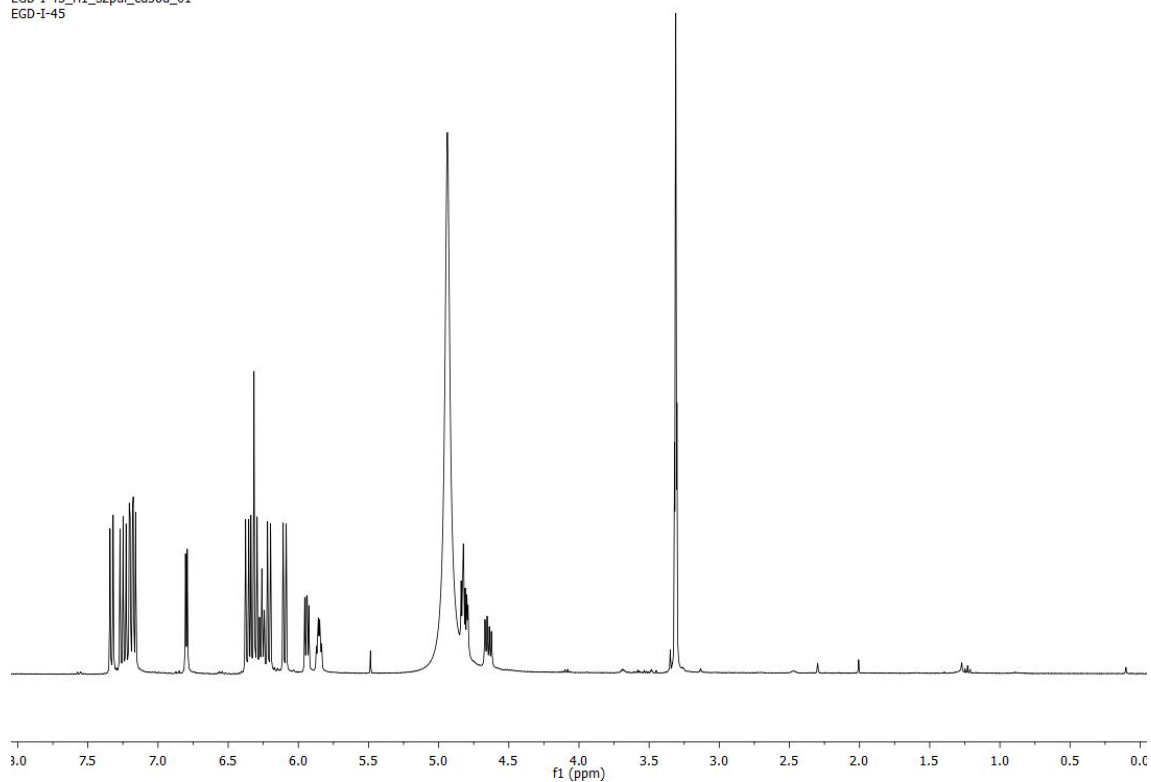

### Compound 15 ( $^{13}\text{C}$ - NMR)

EGD-I-45\_C13\_s2pul\_cd3od\_01  
EGD-I-45

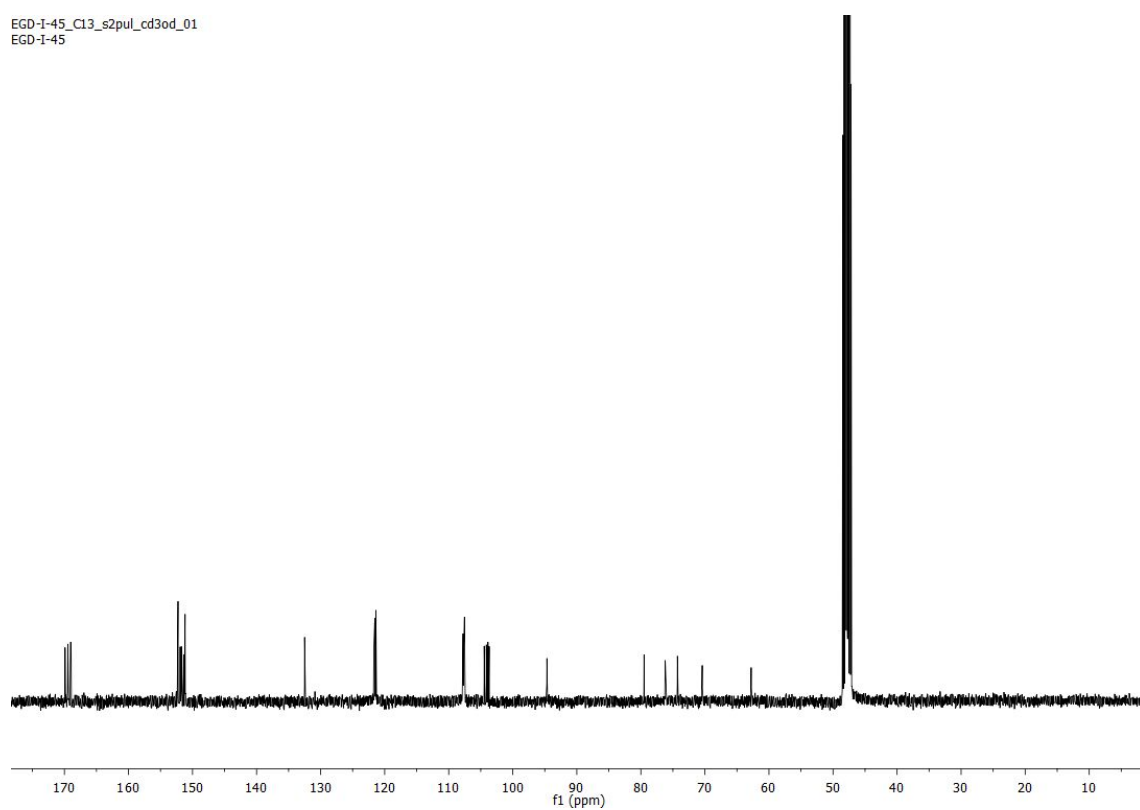

### Compound 16 ( $^1\text{H}$ - NMR)

PCB248F1-CDCL3  
STANDARD 1H OBSERVE

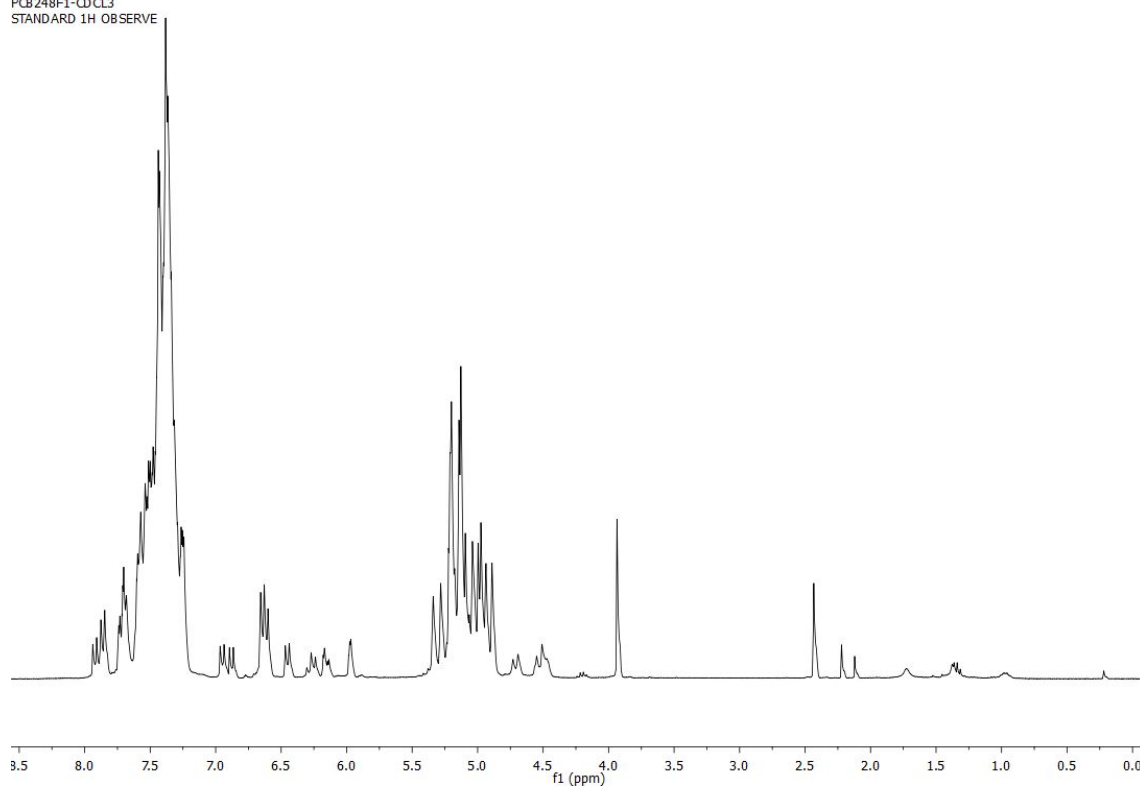

### Compound 16 ( $^{13}\text{C}$ - NMR)

PCB248F1.111.fid

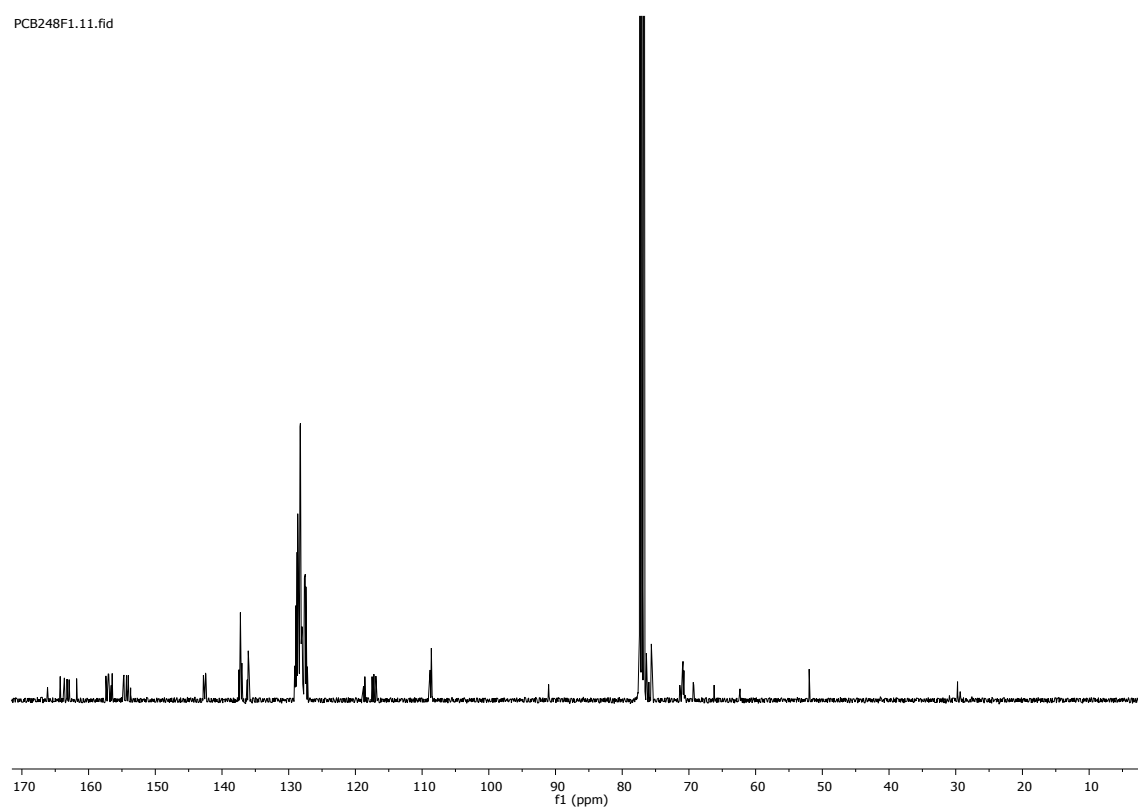

### Compound 17 ( $^1\text{H}$ - NMR)

PCB248F2purifi  
STANDARD 1H OBSERVE

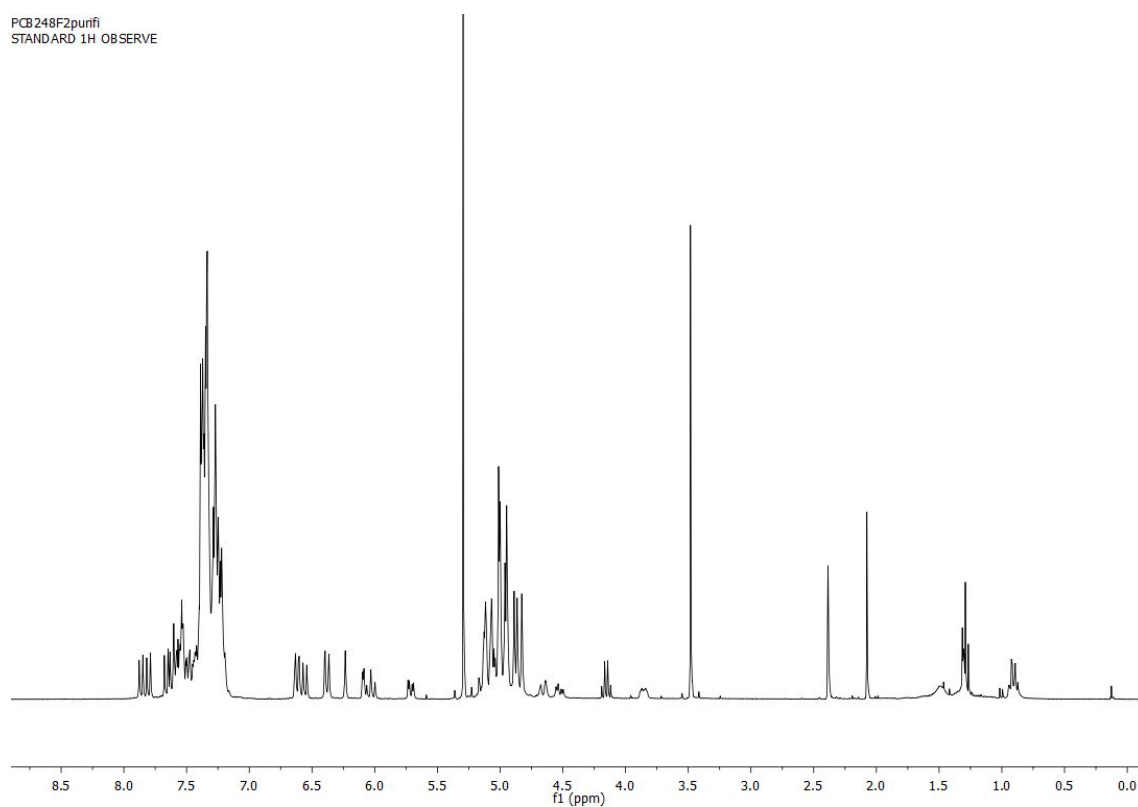

### Compound 18 ( $^1\text{H}$ - NMR)

PCB260t16-23  
STANDARD 1H OBSERVE

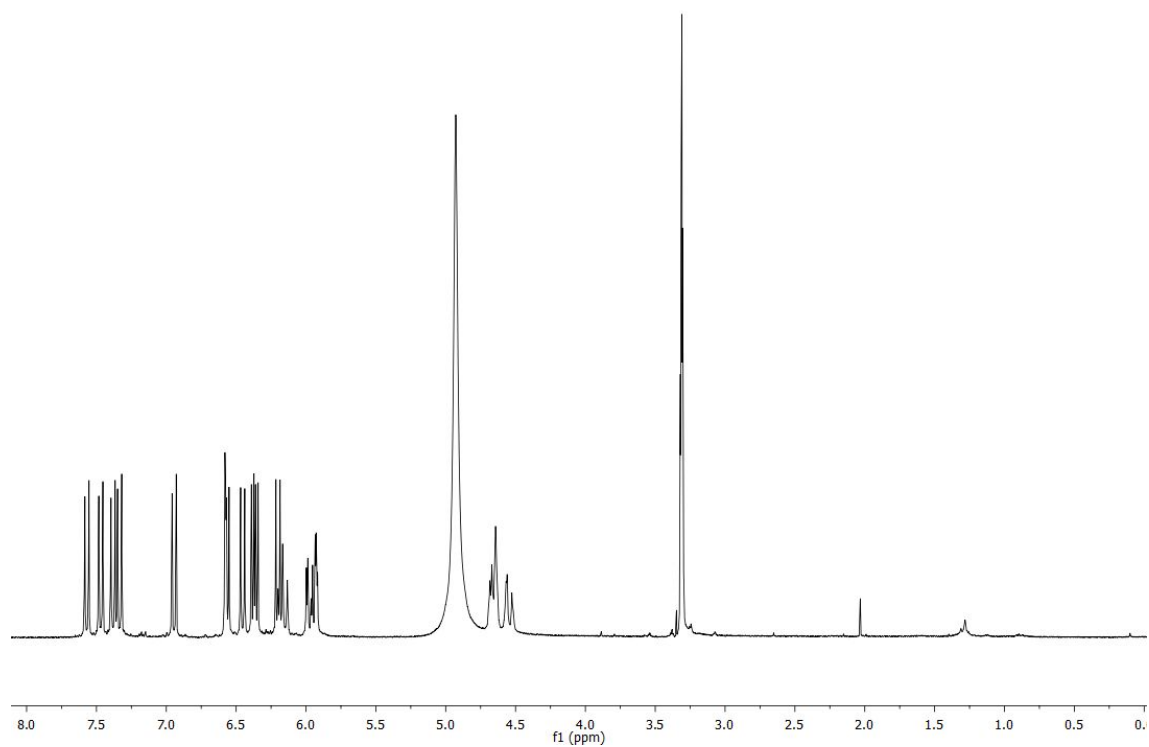

### Compound 18 ( $^{13}\text{C}$ - NMR)

PCB260\_C13\_s2pul\_dmsd\_01  
Std Carbon experiment

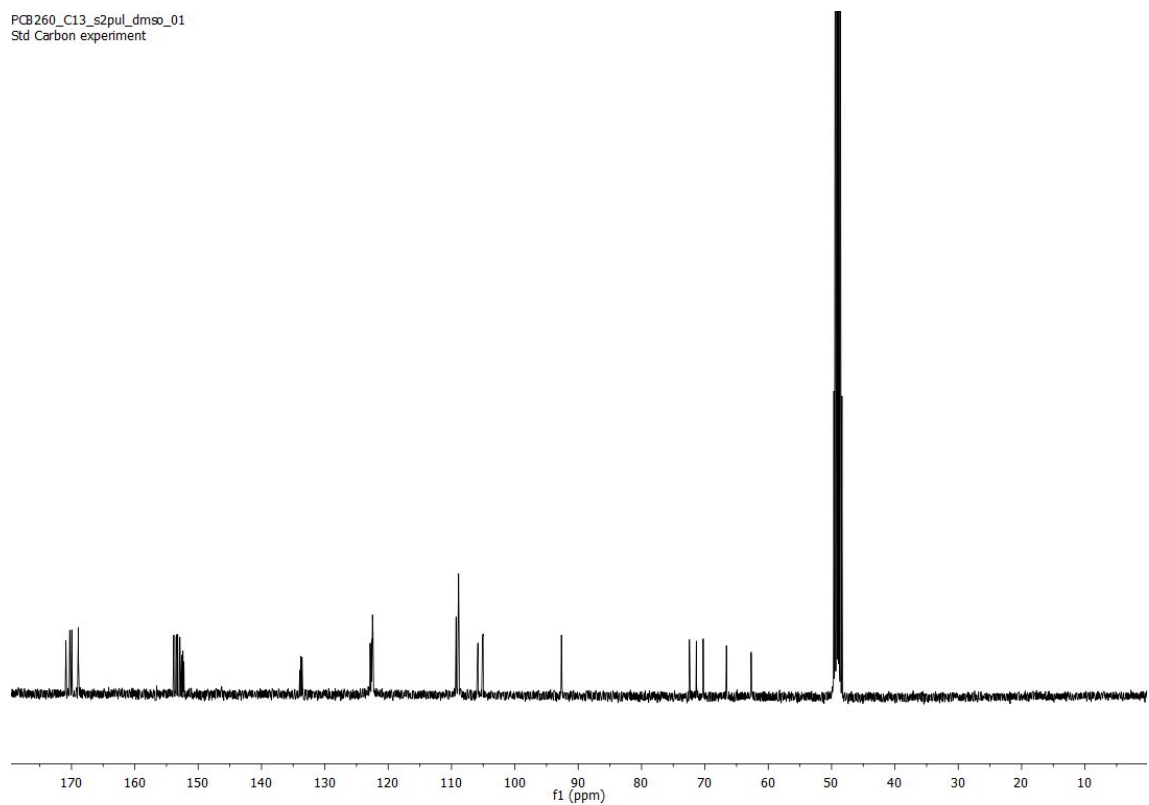

### Compound 19 ( $^1\text{H}$ - NMR)

PCB261-1H  
PCB261

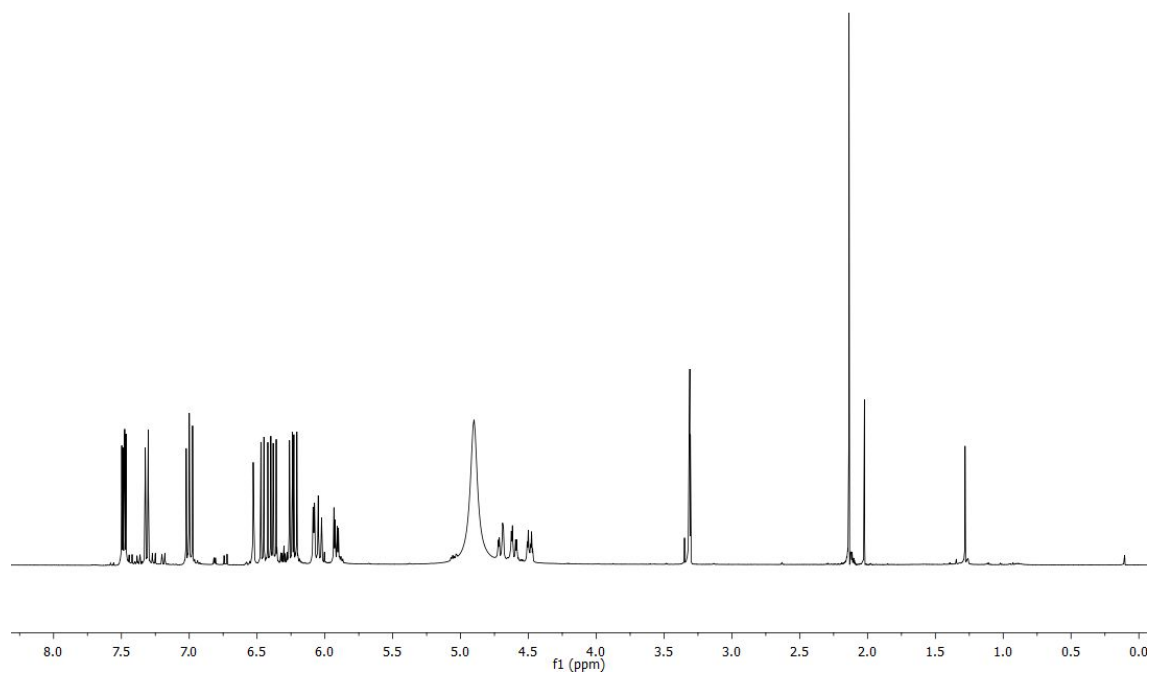

### Compound 19 ( $^{13}\text{C}$ - NMR)

PCB261-Cl3  
PCB261

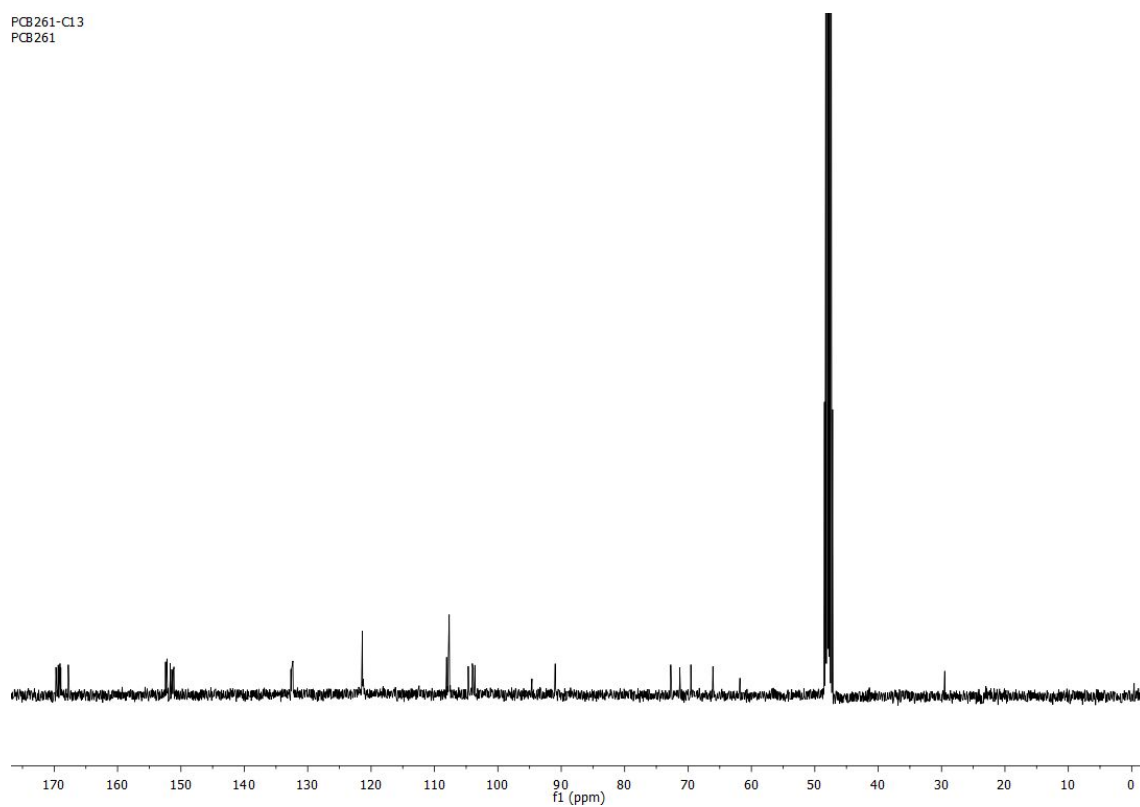

### Compound 20 ( $^1\text{H}$ - NMR)

EGD-I-19-F3  
EGD-I-19-F3-ribosa

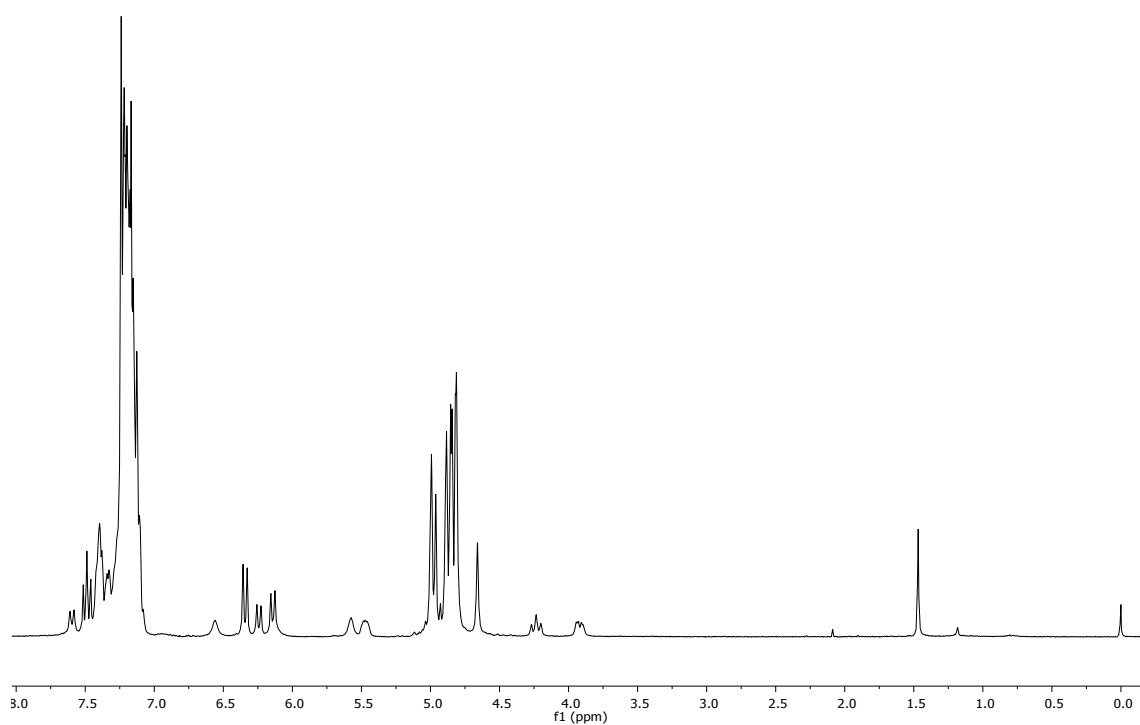

### Compound 20 ( $^{13}\text{C}$ - NMR)

EGD-I-19-F3.11.fid

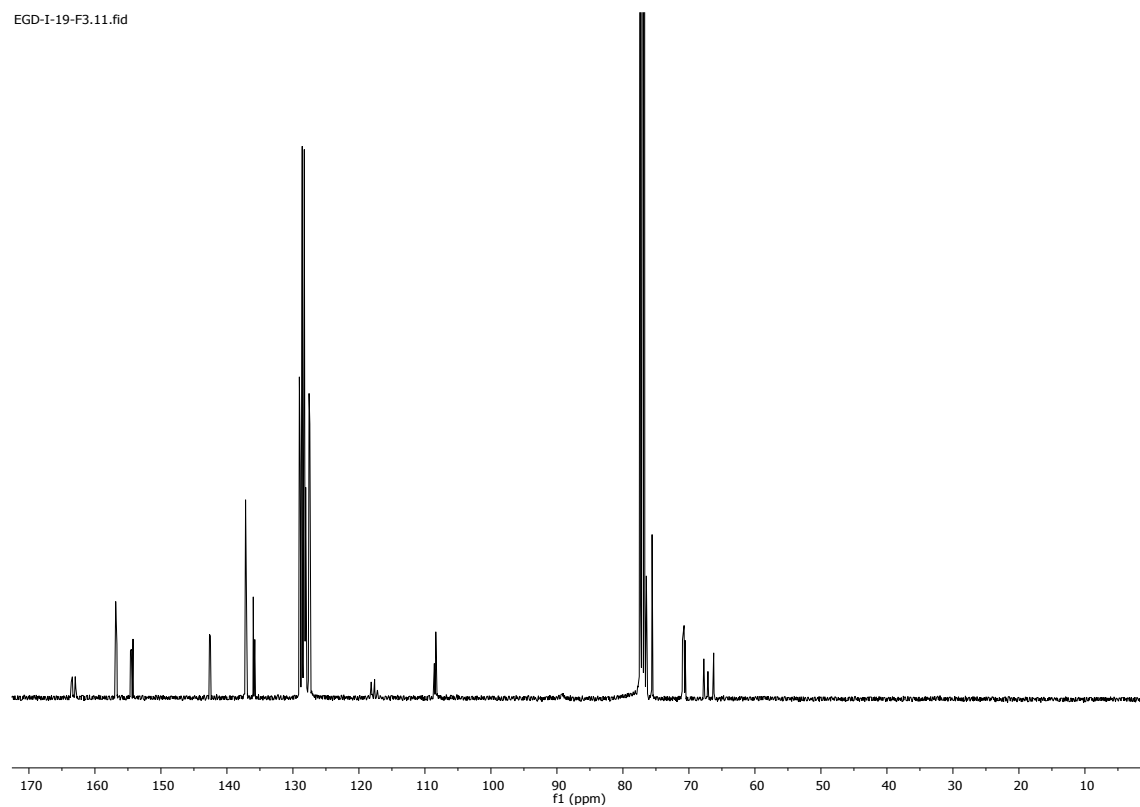



### Compound 21 ( $^1\text{H}$ -NMR)

EGD-I-19-F1.10.fid

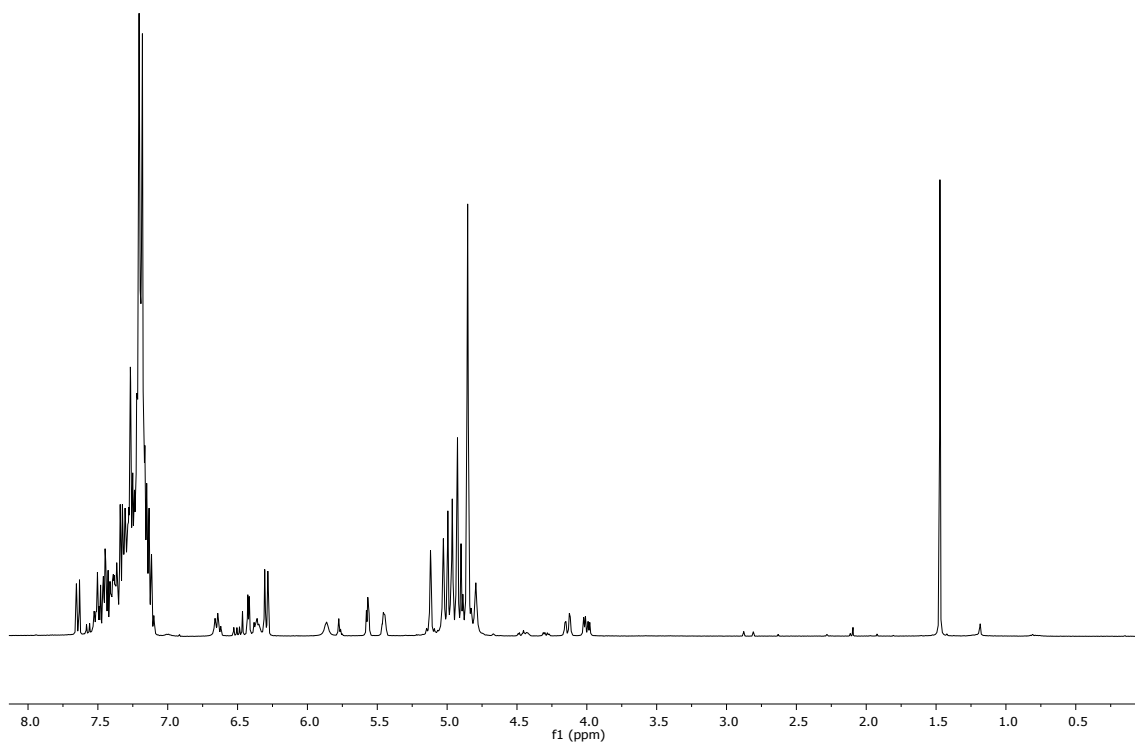

### Compound 21 ( $^{13}\text{C}$ -NMR)

EGD-I-19-F1.11.fid

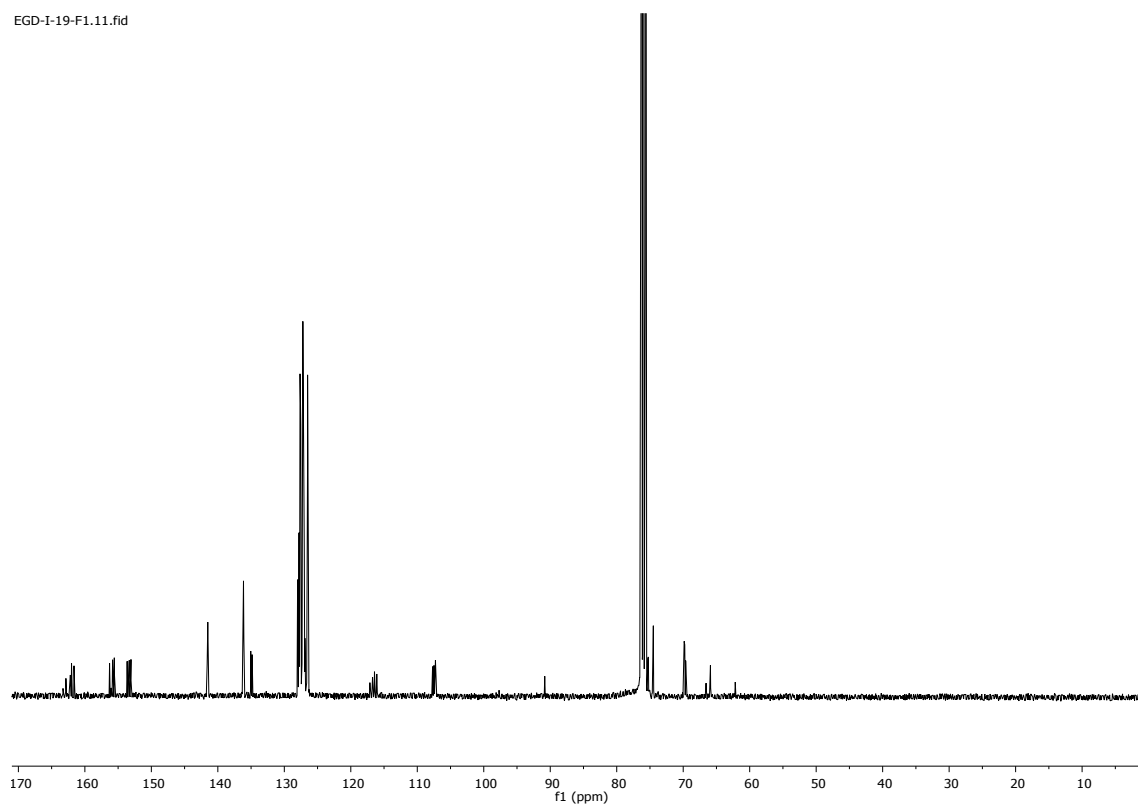

### Compound 22 ( $^1\text{H}$ - NMR)

EGD-I-32-3atrit-aguas1  
EGD-I-32-3atrit-aguas1

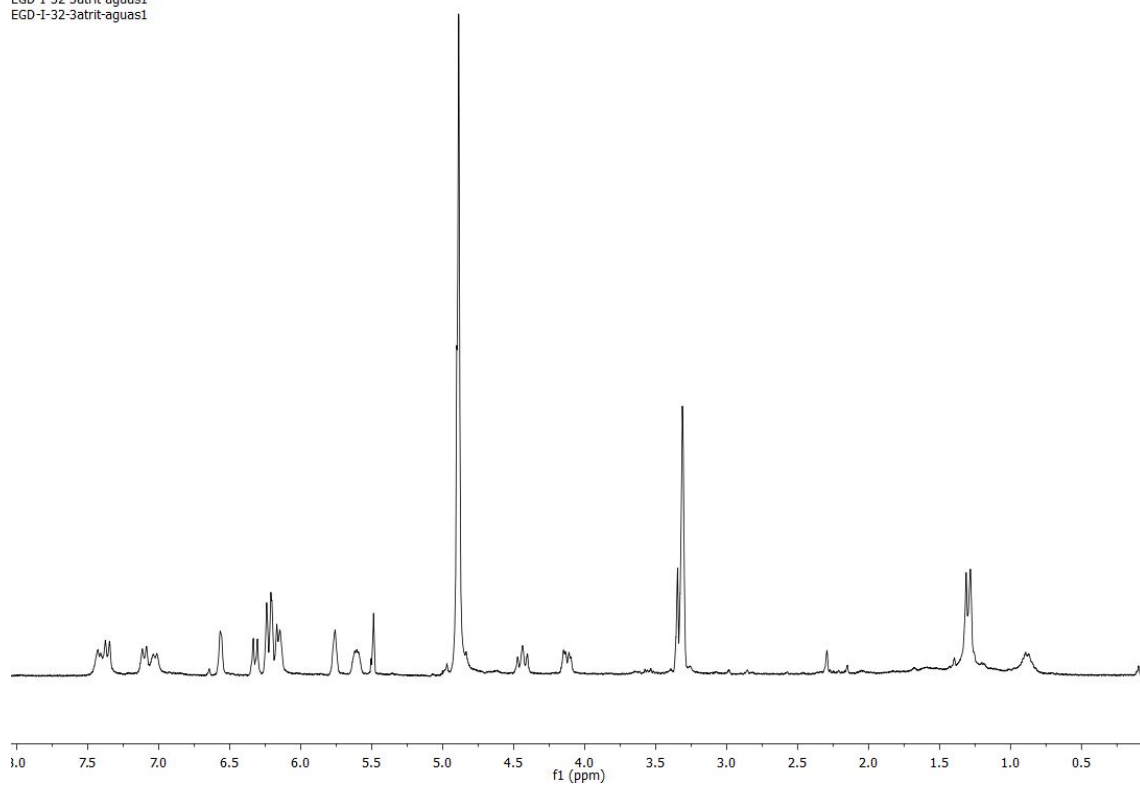

### Compound 22 ( $^{13}\text{C}$ - NMR)

EGD-I-32\_13c  
EGD-I-32

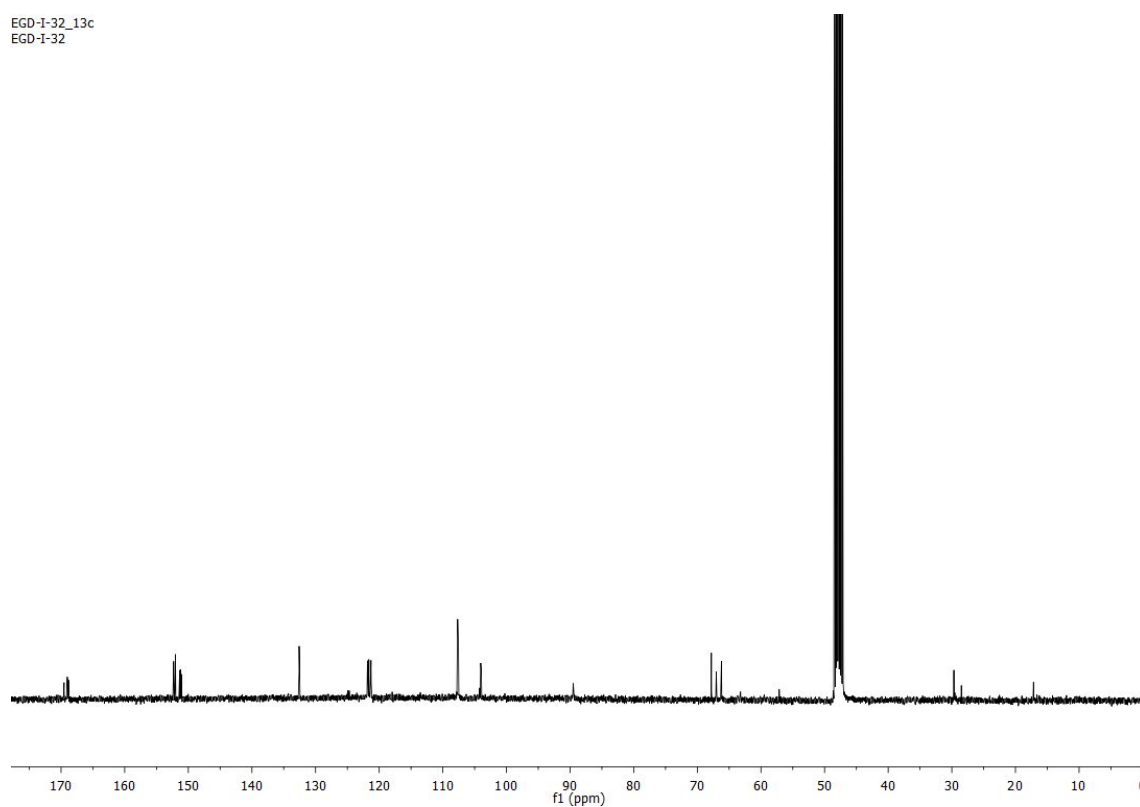

### Compound 23 ( $^1\text{H}$ - NMR)

EGD-I-26\_H1\_s2pul\_cd3od\_01  
EGD-I-26

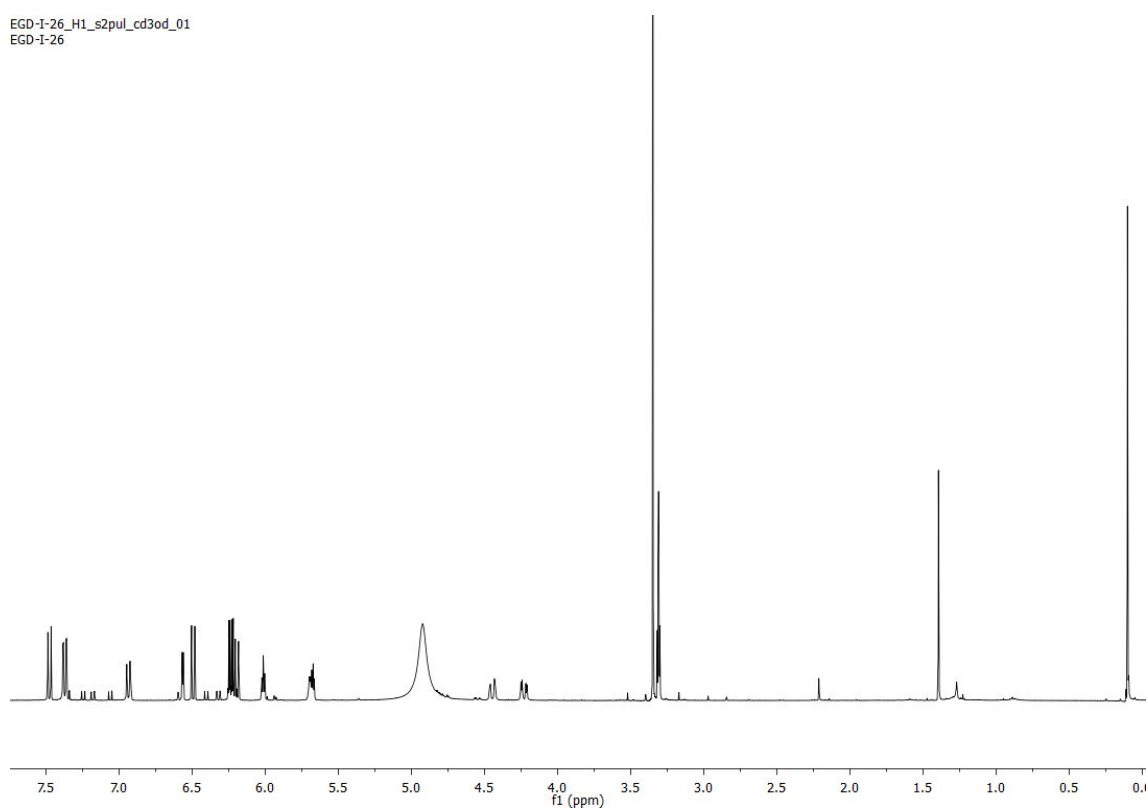

### Compound 23 ( $^{13}\text{C}$ - NMR)

EGD-I-26\_C13\_s2pul\_cd3od\_01  
EGD-I-26

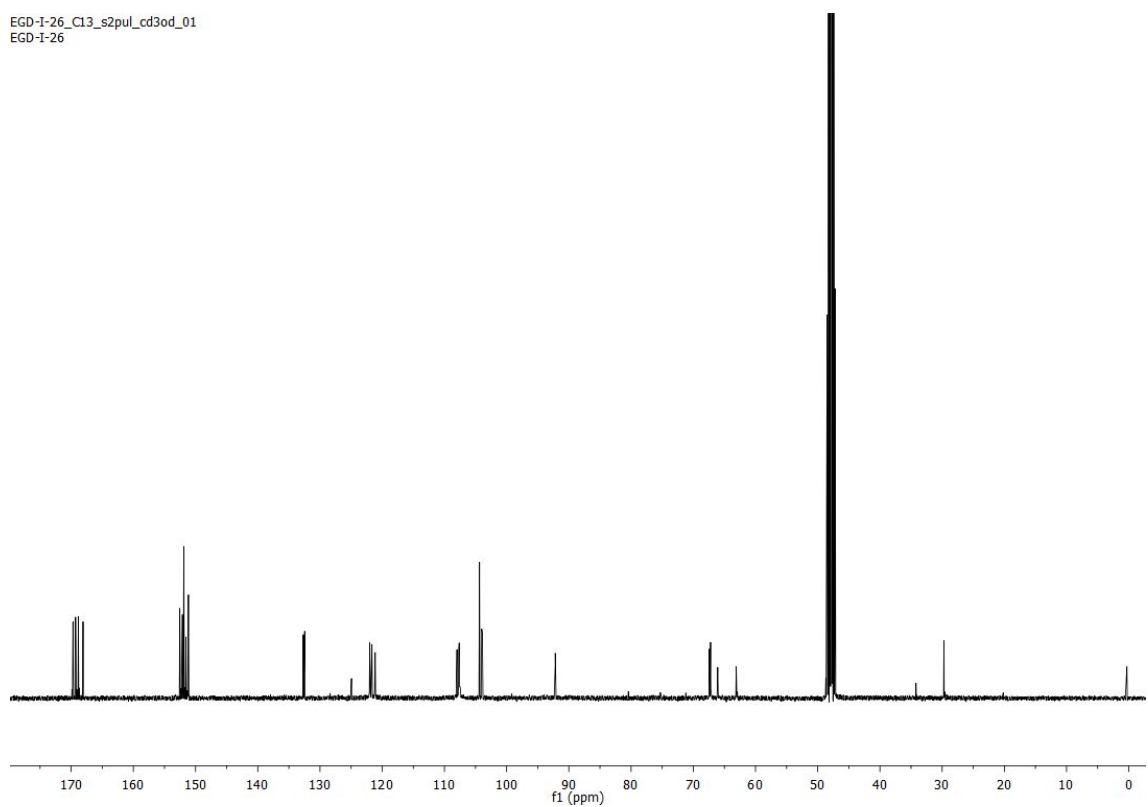

### Compound 24 ( $^1\text{H}$ - NMR)

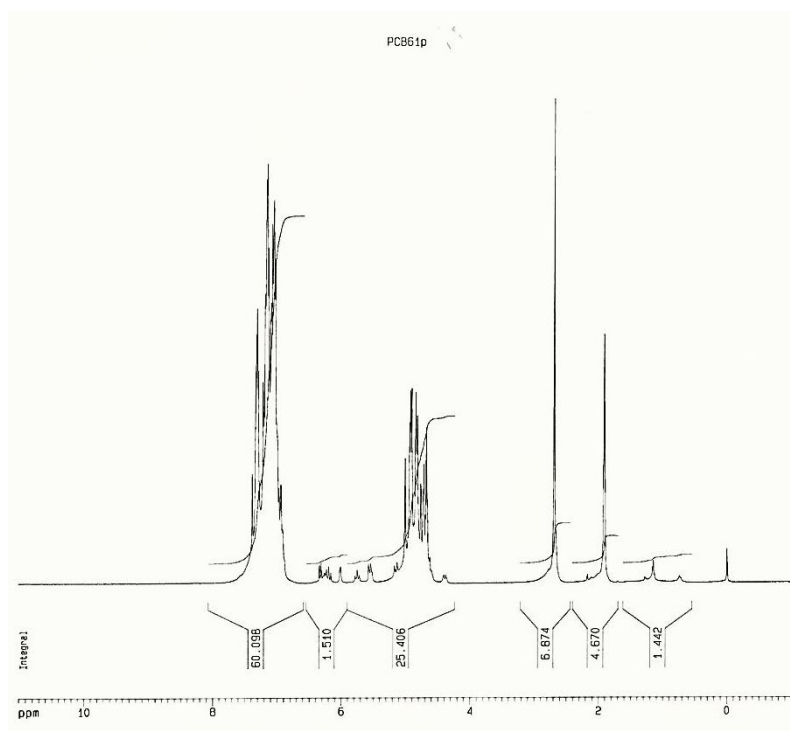

### Compound 25 ( $^1\text{H}$ - NMR)

PCB262\_H1\_s2pul\_cd3od\_01  
PCB262

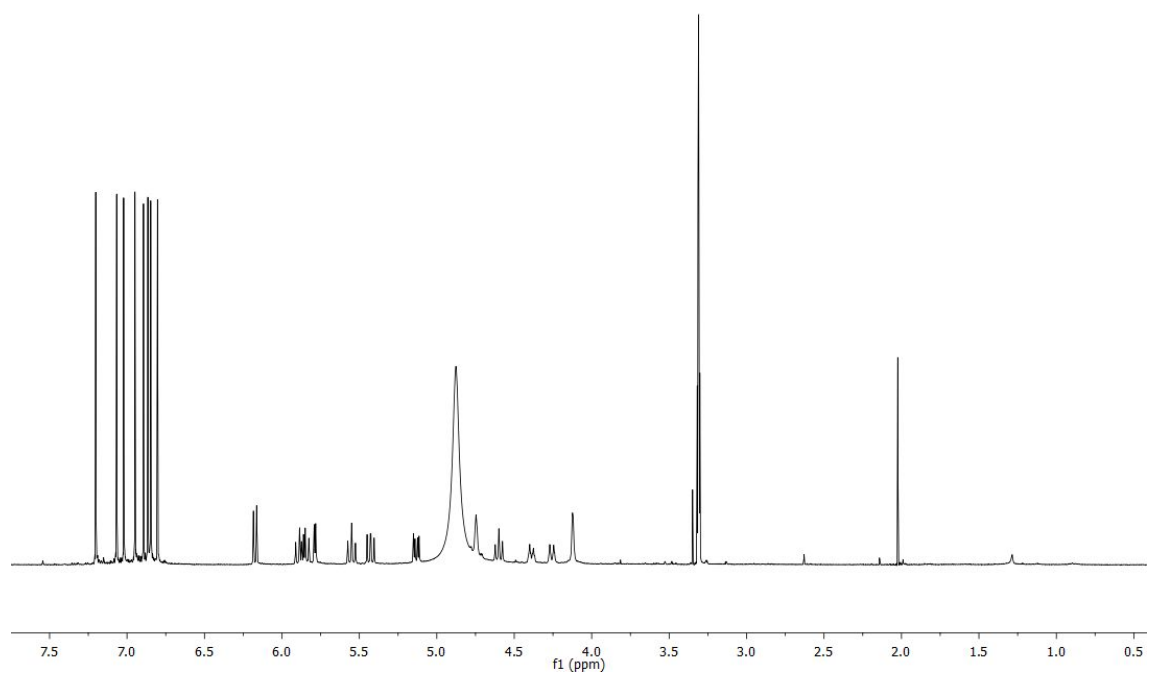

### Compound 25 ( $^{13}\text{C}$ - NMR)

PCB262\_C13\_s2pul\_cd3od\_01  
PCB262

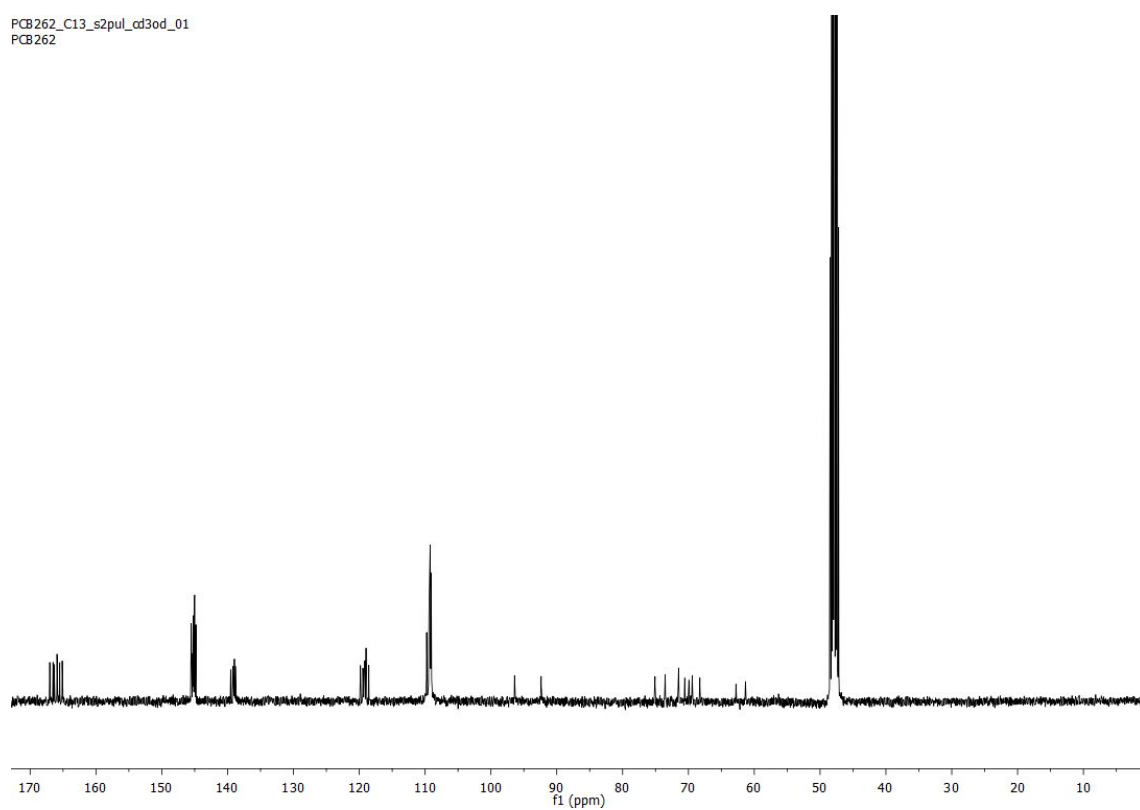

### Compound 26 ( $^1\text{H}$ - NMR)

AL-35.10.fid

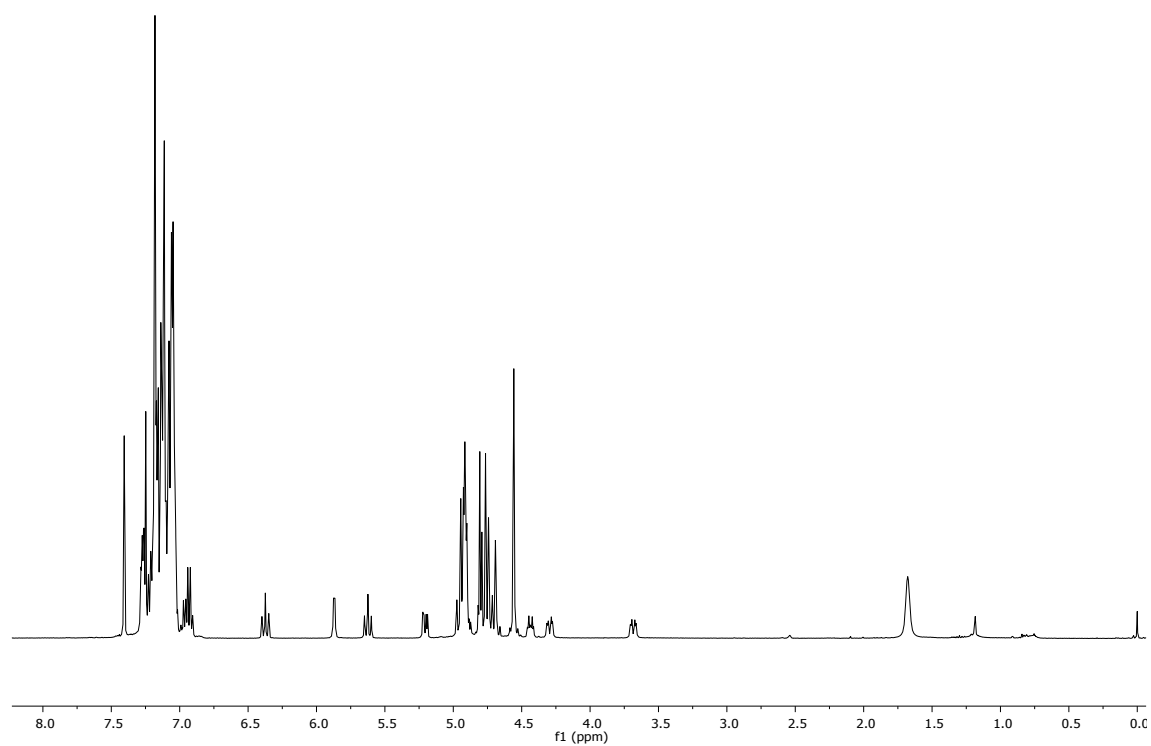

### Compound 26 ( $^{13}\text{C}$ - NMR)

AL-35.11.fid

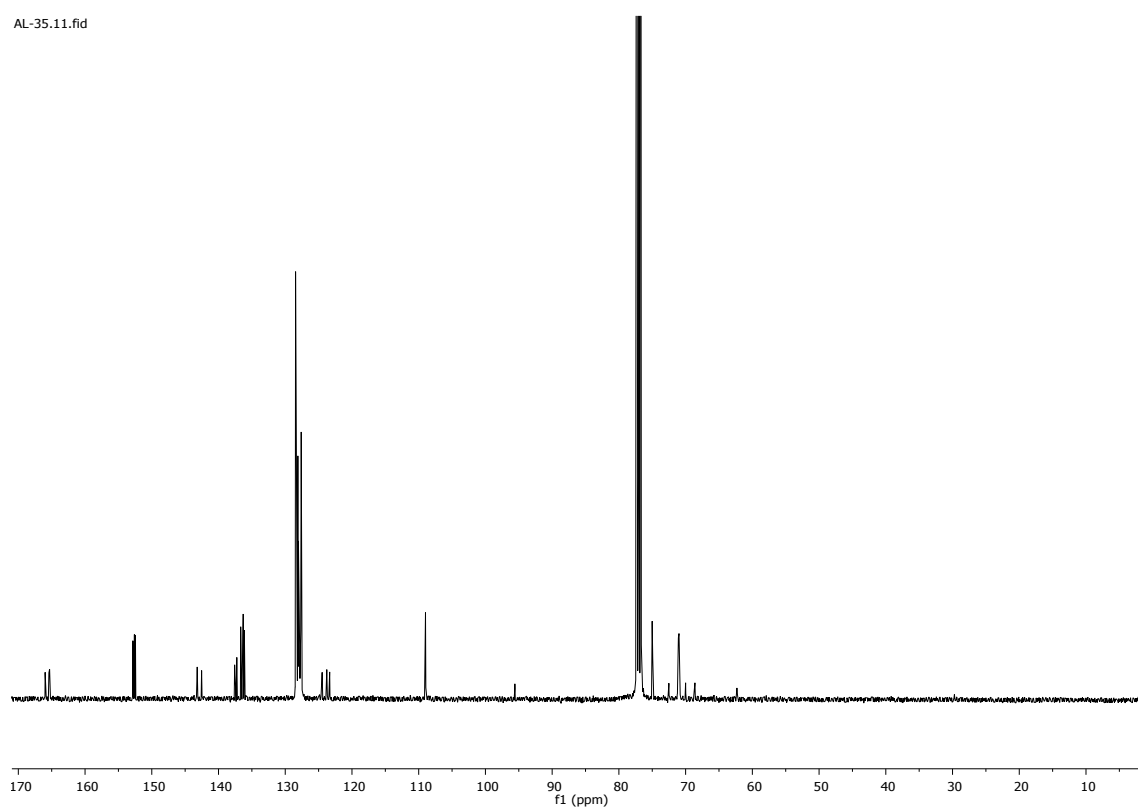

### Compound 27 ( $^1\text{H}$ - NMR)

AL-166.10.fid

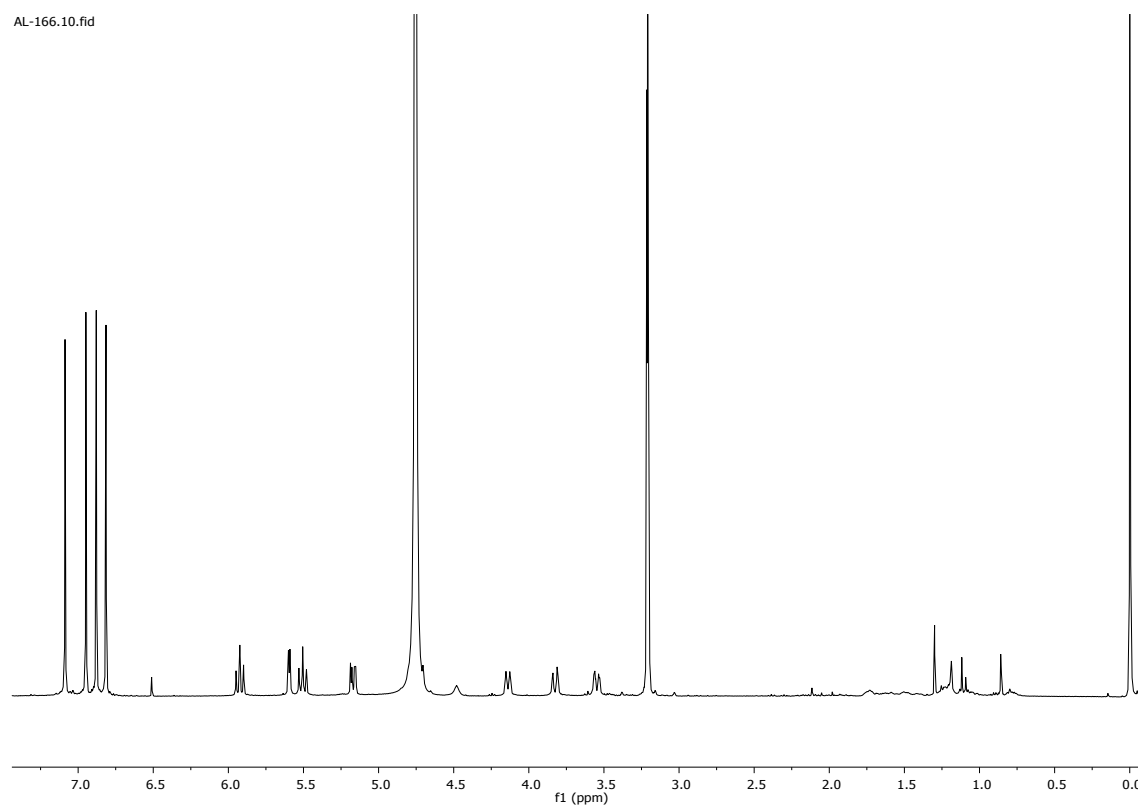

### Compound 27 ( $^{13}\text{C}$ - NMR)

AL-166.11.fid

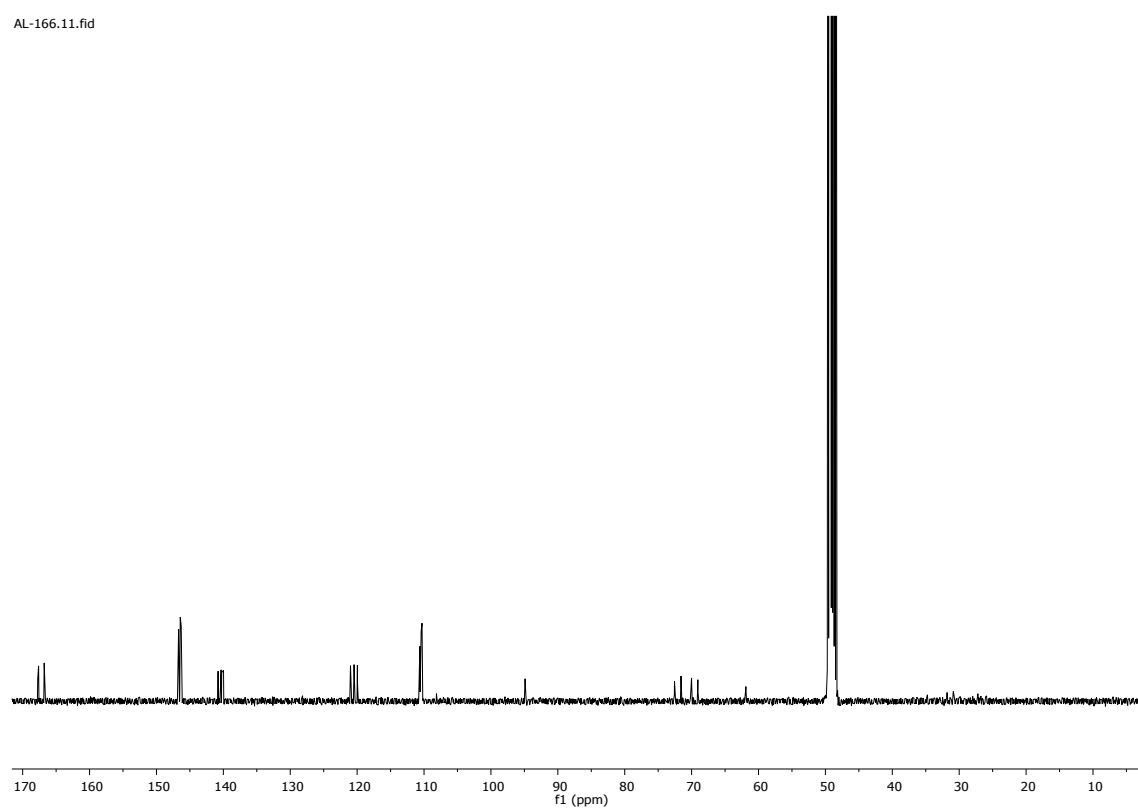

### Compound 28 ( $^1\text{H}$ - NMR)

EGD-I-5-maltosa-toluene  
EGD-I-5-maltosa-toluene-cdcl3

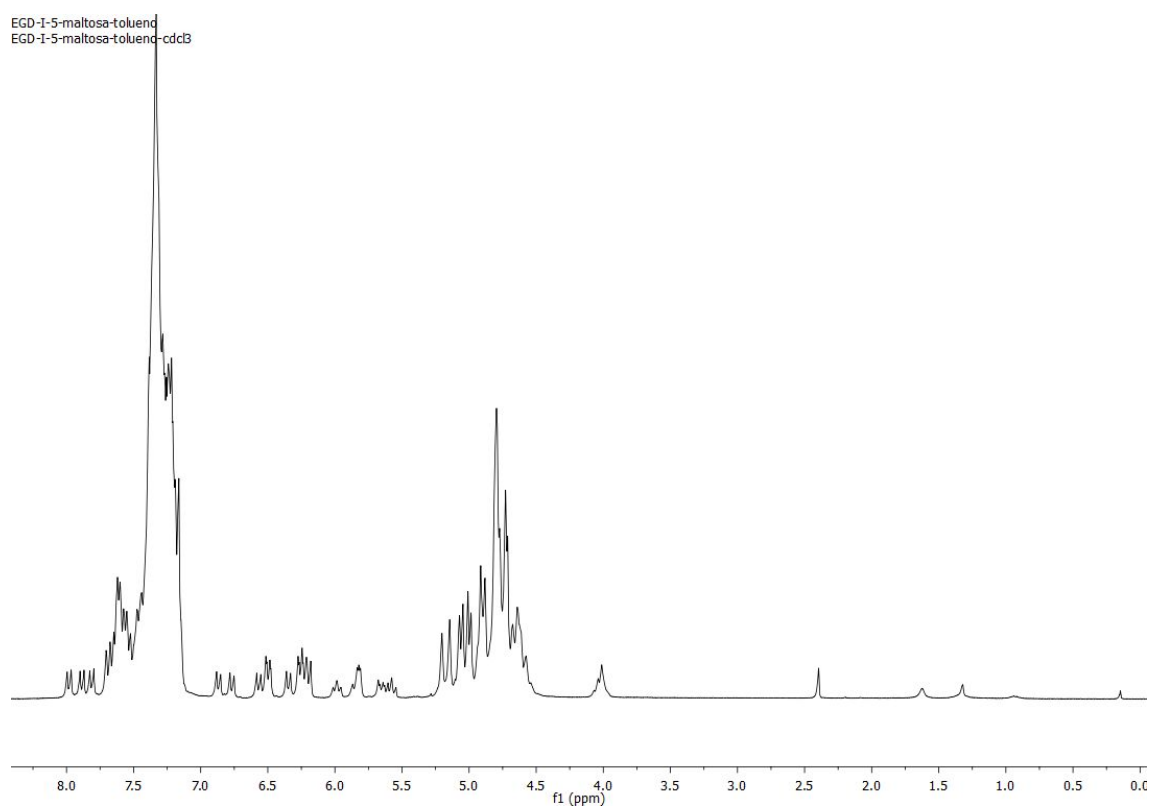

### Compound 28 ( $^{13}\text{C}$ -NMR)

EGD-I-05.11.fid

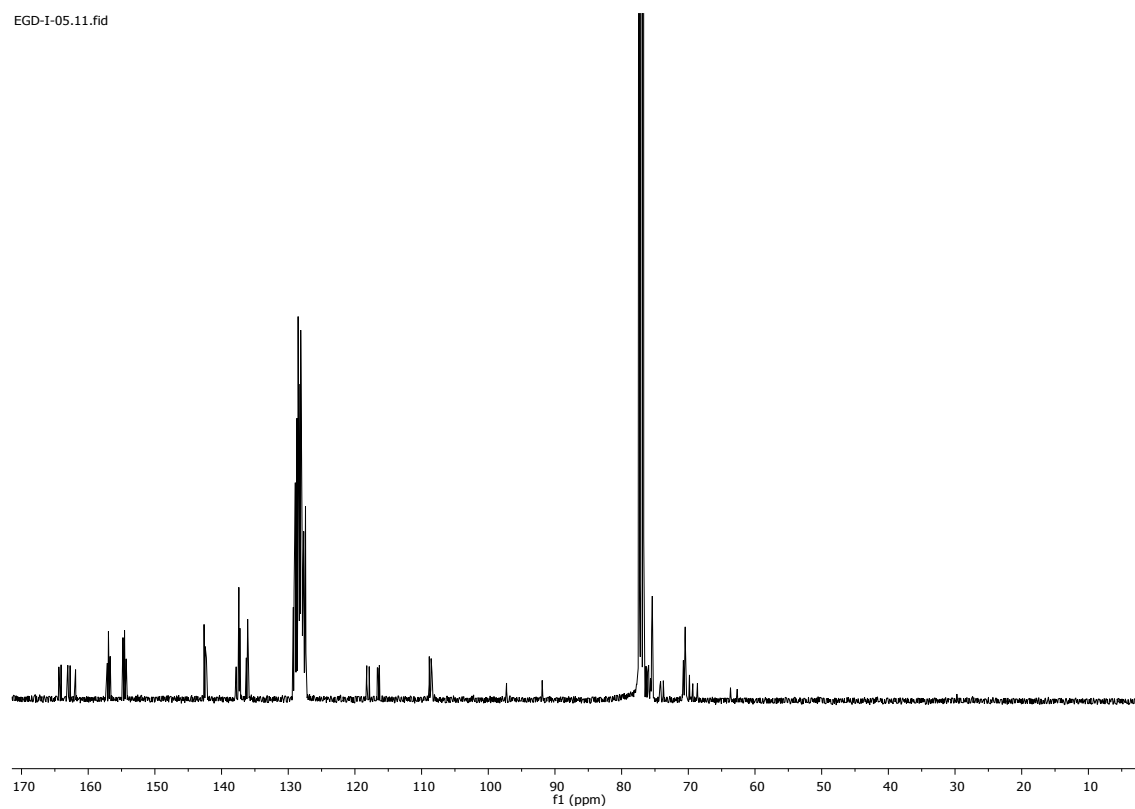

### Compound 29 ( $^1\text{H}$ -NMR)

EGD-I-33-1H  
EGD-I-33

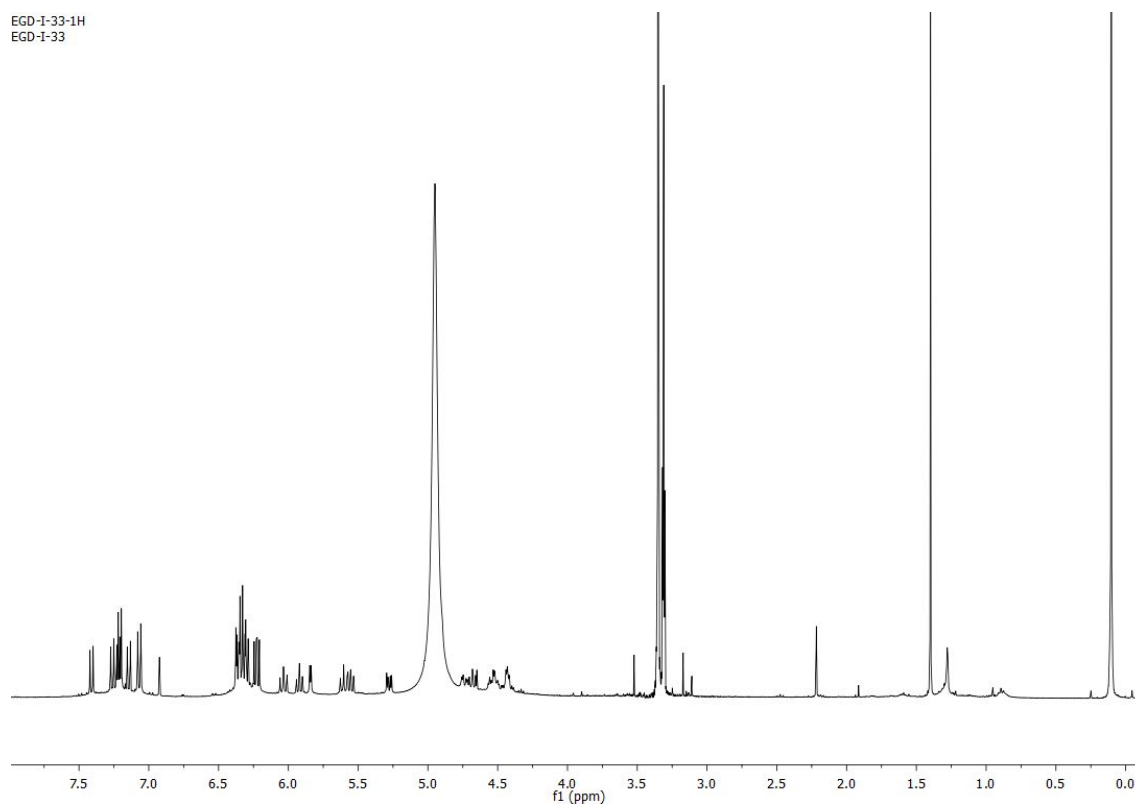



### Compound 29 ( $^{13}\text{C}$ -NMR)

EGD-I-33-C13  
EGD-I-33

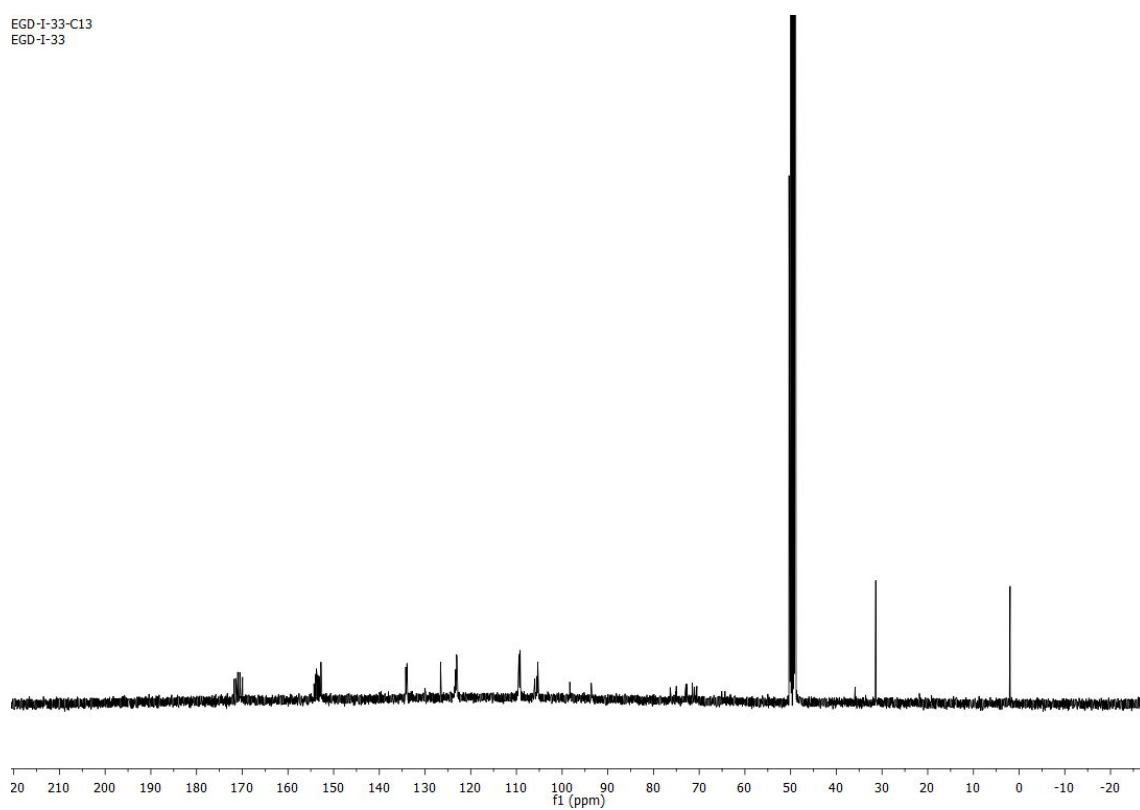

### Compound 30 ( $^1\text{H}$ -NMR)

EGD-I-12-F1-toluene  
EGD-I-12-F1-toluene- $\alpha$ -d<sub>3</sub>

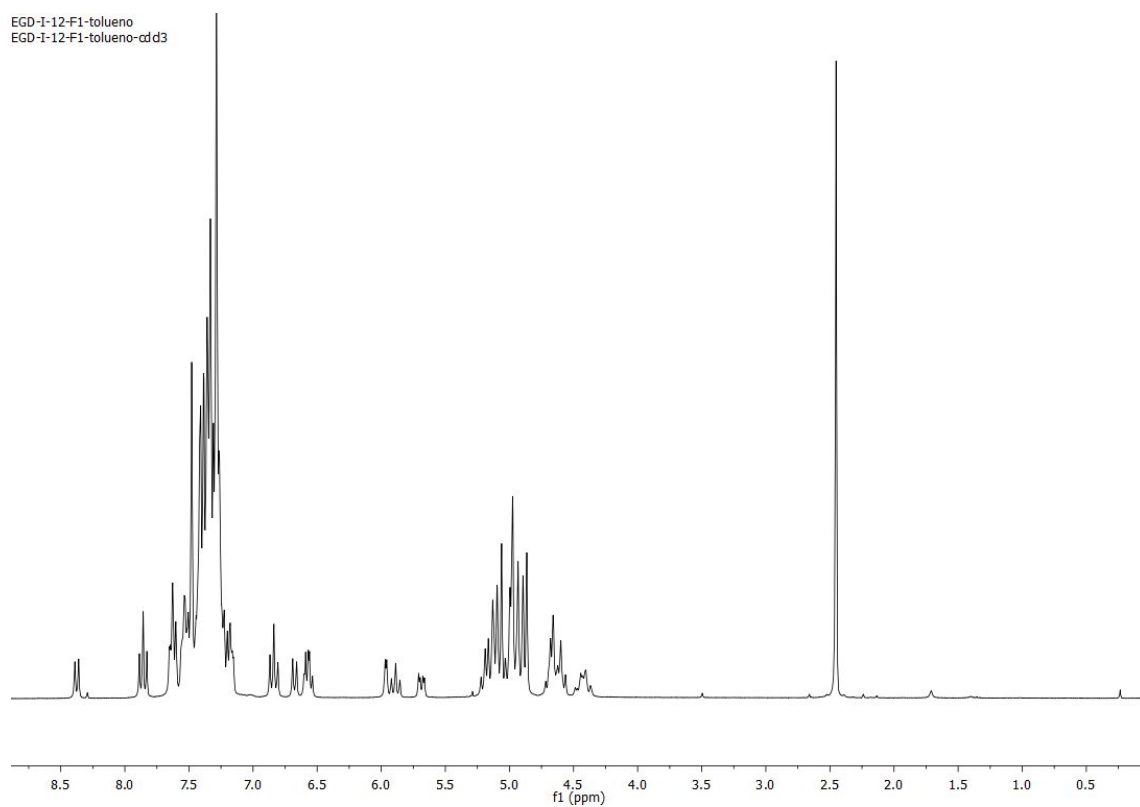

### Compound 30 ( $^{13}\text{C}$ -NMR)

EGD-I-12.11.fid

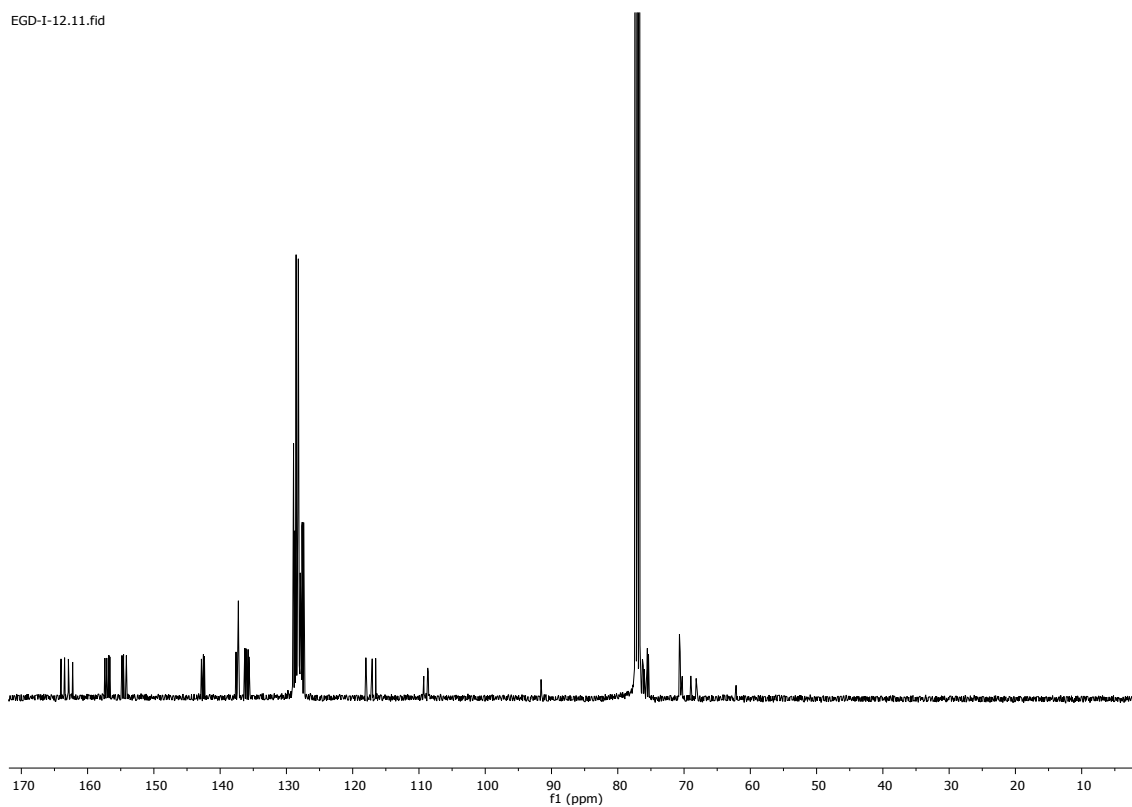

### Compound 31 ( $^1\text{H}$ -NMR)

EGD-I-31-trehalosa  
EGD-I-31-trehalosa-cd3od

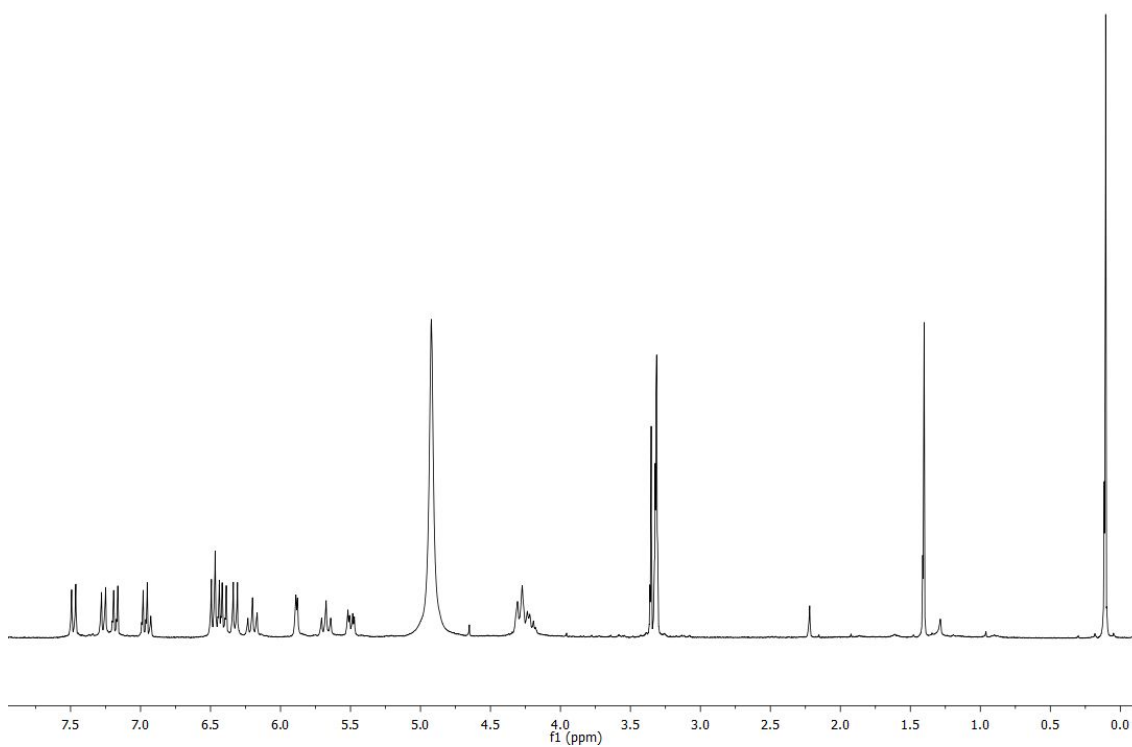

## Compound 31 (<sup>13</sup>C-NMR)

EGD-I-31\_13c  
EGD-I-31

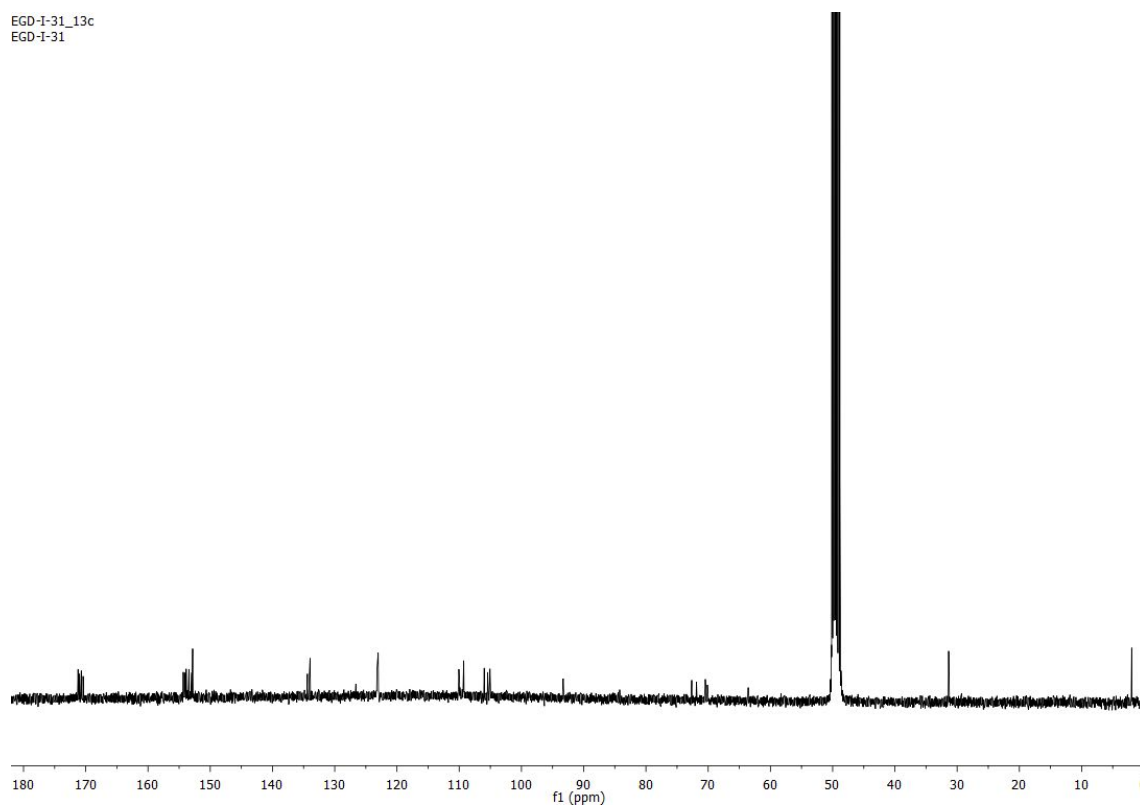

## References

1. Ren, Y.; Himmeldirk, K.; Che, X. Synthesis and structure-activity relationship study of antidiabetic penta-*O*-galloyl-D-glucopyranose and its analogues. *J. Med. Chem.* **2006**, *49*, 2829-2837.
2. Duus, J.Ø.; Gottfredsen, Ch. H.; Bock, K. Carbohydrate structural determination by NMR spectroscopy: modern methods and limitations, *Chem. Rev.* **2000**, *100*, 4589-4614.
3. Hurd, R.E.; John, B.K. Gradient-Enhanced Proton-Detected Heteronuclear Multiple-Quantum Coherence Spectroscopy, *J. Magn. Reson.* **1991**, *91*, 648-653.
4. Kay, L.E.; Keifer, P.; Saarinen, T. Pure absorption gradient enhanced heteronuclear single quantum correlation spectroscopy with improved sensitivity, *J. Am. Chem. Soc.* **1992**, *114*, 10663-10665.
5. Gola, G; Libenson P.; Gandolfi-Donadio L.; Gallo-Rodriguez C. Synthesis of 2,3,5,6-tetra-*O*-benzyl-D-galactofuranose for  $\alpha$ -glycosidation. *Arkivoc* **2005** (xii) 234-242.
6. Decoster E.; Lacombe J.-M.; Strebler J.-L; Ferrari., B.; Pavia, A. *J. Carbohydr. Chem.* **1983**, *2*, 329-341.
7. Bock K.; Pedersen C. Carbon-13 Nuclear Magnetic Resonance Spectroscopy of Monosaccharides, *Adv. Carbohydr. Chem. Biochem.* **1983**, *41*, 27-66.
